# Supplementary material for: A Novel Mechanism for Binding of Galactose-terminated Glycans by the C-type Carbohydrate Recognition Domain in Blood Dendritic Cell Antigen 2
Source: PubMed Central journal article supplement (PMC4505424; doi:10.1074/jbc.m115.660613), 2015-05-20
Supplement: supp_M115.660613_jbc.M115.660613-1.pdf [file supp_M115.660613_jbc.M115.660613-1.pdf]

Supplemental Information

**Blood Dendritic Cell Antigen 2 Binds Selectively to Galactose-terminated Glycans through a Mannose-type Binding Site**

Hadar Feinberg, Sabine A. F. Jégouzo, Tabassum Dungarwalla,  
Kurt Drickamer, William I. Weis, and Maureen E. Taylor

**Table S1.** Screening of BDCA-2 on CFG Glycan Array version 5.1.

**Figure S1.** Mass spectrometry of BDCA-2 trisaccharide ligand.

**Figure S2.** Proton NMR spectrum of BDCA-2 trisaccharide ligand.

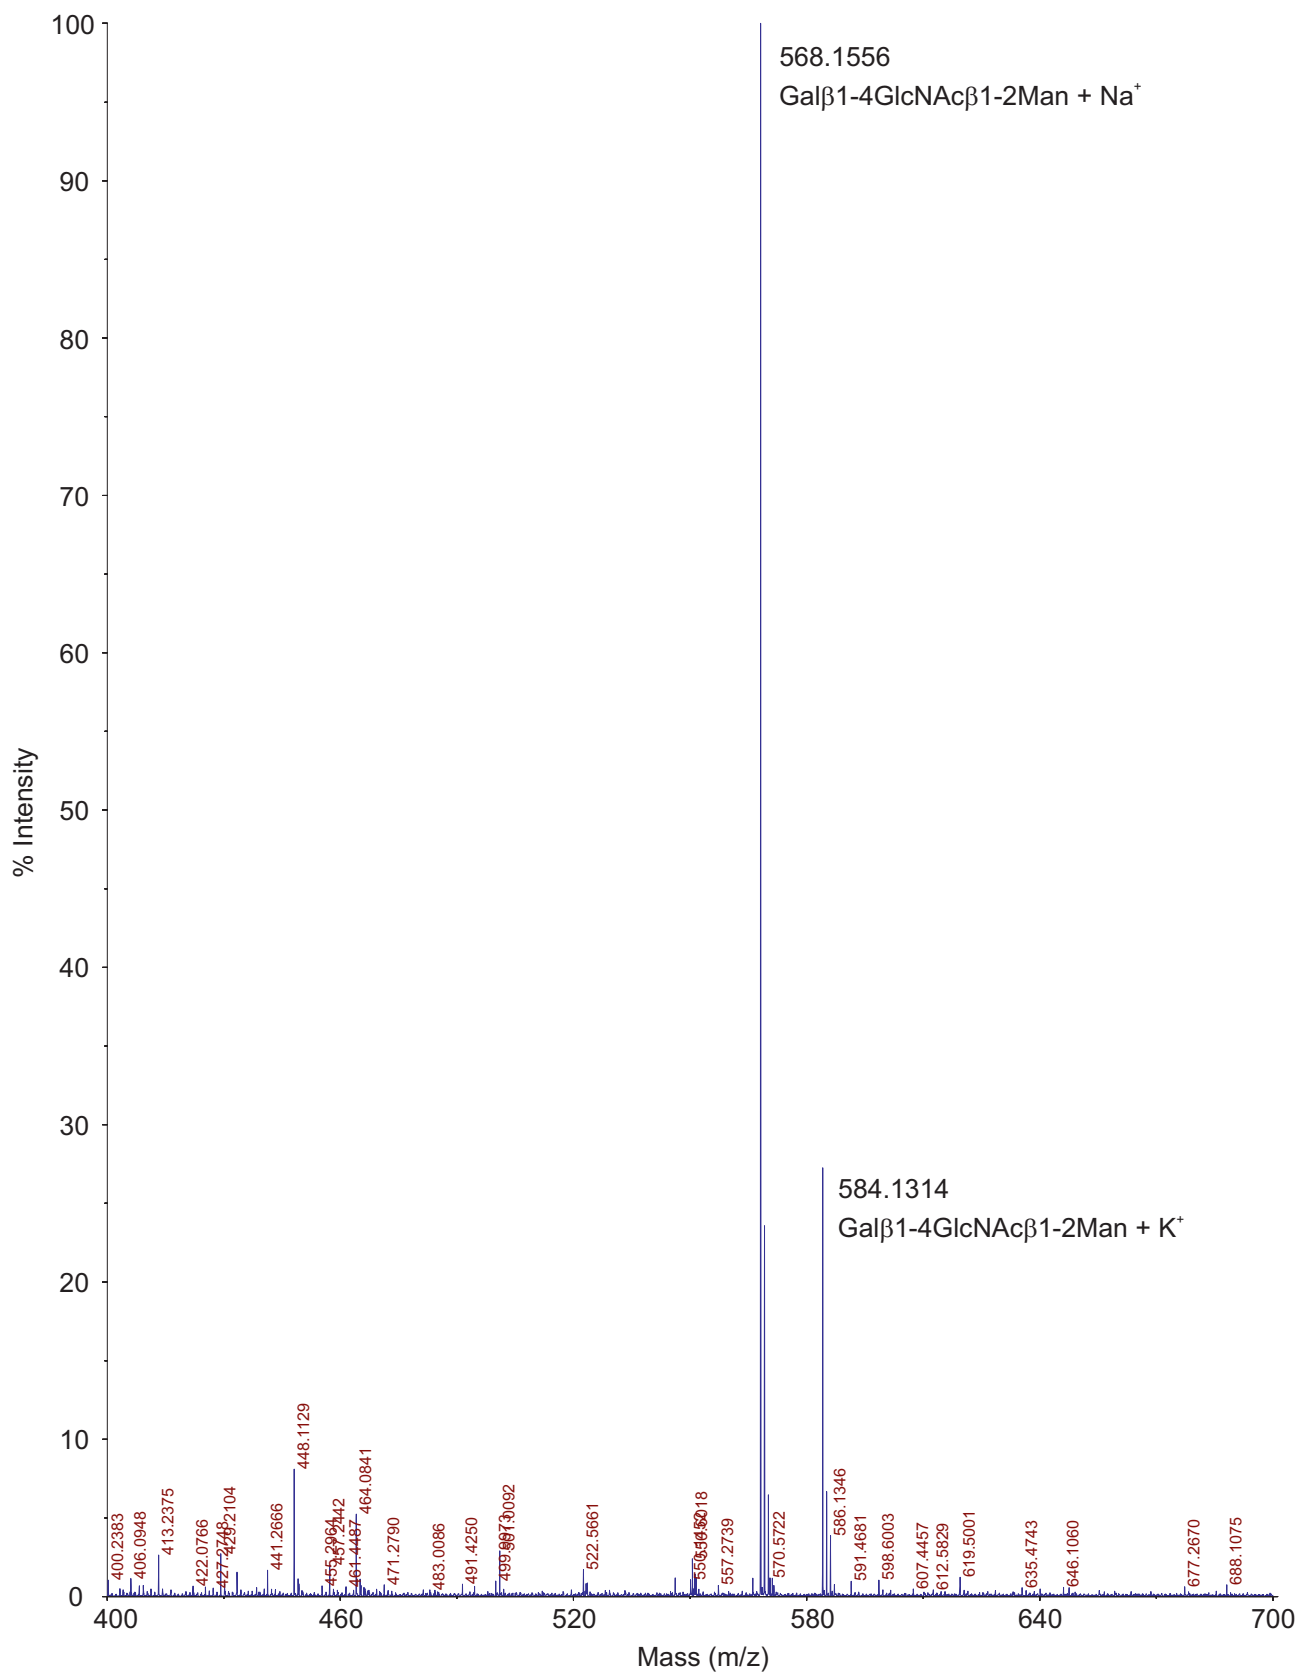

**Figure S1. Mass spectrometry of synthetic trisaccharide.** Samples were prepared by spotting together equal volumes of matrix, 2,5-dihydroxybenzoic acid as a 10 mg/ml solution 80% methanol, and sugar derivative, dissolved at approximately 1 mg/ml in water, on a target plate. Mass spectrometry was performed on an Applied Biosystems 4800 matrix assisted-laser desorption time-of-flight mass spectrometer.

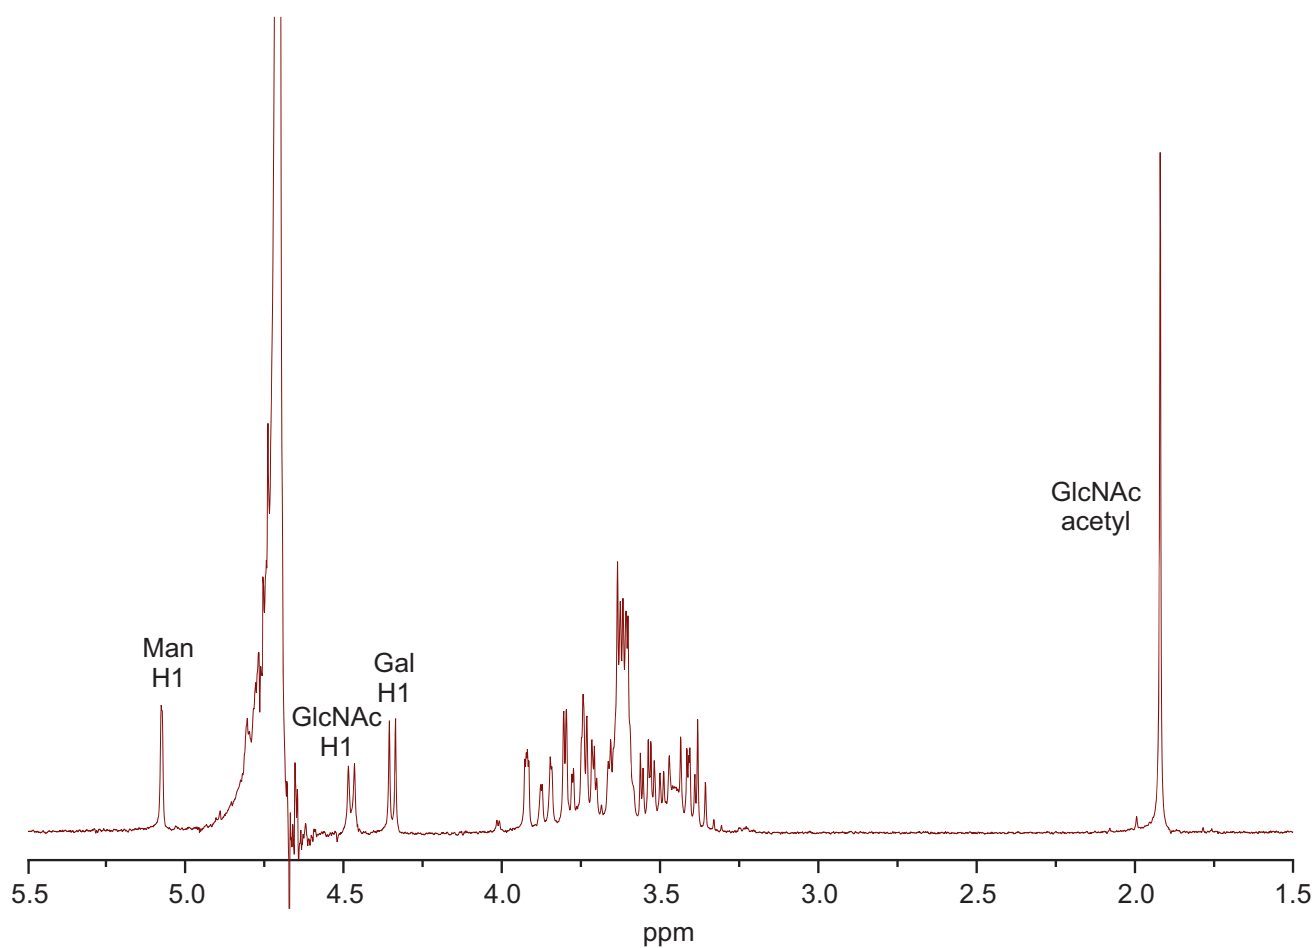

**Figure S2. Proton NMR spectra of trisaccharide ligand for BDCA-2.** Sample for NMR spectra, dissolved in at approximately 2 mg/ml, was analyzed on a Bruker 400 MHz spectrometer.

**Table S1. Screening of BDCA-2 on CFG Glycan Array version 5.1**

| Glycan number | Glycan structure                                                                                                                                                                                               | Average RFU | Standard Deviation |
|---------------|----------------------------------------------------------------------------------------------------------------------------------------------------------------------------------------------------------------|-------------|--------------------|
| 301           | Neu5Ac $\alpha$ 2-6Gal $\beta$ 1-4GlcNAc $\beta$ 1-2Man $\alpha$ 1-6(Gal $\beta$ 1-4GlcNAc $\beta$ 1-2Man $\alpha$ 1-3)Man $\beta$ 1-4GlcNAc $\beta$ 1-4GlcNAc $\beta$ -Sp12                                   | 5886        | 161                |
| 485           | Gal $\beta$ 1-4GlcNAc $\beta$ 1-6(Gal $\beta$ 1-4GlcNAc $\beta$ 1-2)Man $\alpha$ 1-6(Gal $\beta$ 1-4GlcNAc $\beta$ 1-2Man $\alpha$ 1-3)Man $\beta$ 1-4GlcNAc $\beta$ 1-4(Fuc $\alpha$ 1-6)GlcNAc $\beta$ -Sp24 | 4117        | 162                |
| 404           | Gal $\alpha$ 1-4Gal $\beta$ 1-4GlcNAc $\beta$ 1-2Man $\alpha$ 1-6(Gal $\alpha$ 1-4Gal $\beta$ 1-4GlcNAc $\beta$ 1-2Man $\alpha$ 1-3)Man $\beta$ 1-4GlcNAc $\beta$ 1-4GlcNAc $\beta$ -Sp24                      | 4069        | 138                |
| 324           | Gal $\beta$ 1-3GlcNAc $\beta$ 1-2Man $\alpha$ 1-6(Gal $\beta$ 1-3GlcNAc $\beta$ 1-2Man $\alpha$ 1-3)Man $\beta$ 1-4GlcNAc $\beta$ 1-4GlcNAc $\beta$ -Sp19                                                      | 3985        | 328                |
| 54            | Gal $\beta$ 1-4GlcNAc $\beta$ 1-2Man $\alpha$ 1-6(Gal $\beta$ 1-4GlcNAc $\beta$ 1-2Man $\alpha$ 1-3)Man $\beta$ 1-4GlcNAc $\beta$ 1-4GlcNAc $\beta$ -Sp12                                                      | 3667        | 140                |
| 458           | Gal $\beta$ 1-4GlcNAc $\beta$ 1-6(Gal $\beta$ 1-4GlcNAc $\beta$ 1-2)Man $\alpha$ 1-6(Gal $\beta$ 1-4GlcNAc $\beta$ 1-2Man $\alpha$ 1-3)Man $\beta$ 1-4GlcNAc $\beta$ 1-4GlcNAc $\beta$ -Sp19                   | 3502        | 296                |
| 397           | GlcNAc $\beta$ 1-2Man $\alpha$ 1-6(Gal $\beta$ 1-4GlcNAc $\beta$ 1-2Man $\alpha$ 1-3)Man $\beta$ 1-4GlcNAc $\beta$ 1-4GlcNAc-Sp12                                                                              | 3461        | 245                |
| 349           | Gal $\beta$ 1-4GlcNAc $\beta$ 1-2Man $\alpha$ 1-3Man $\beta$ 1-4GlcNAc $\beta$ 1-4GlcNAc-Sp12                                                                                                                  | 2918        | 324                |
| 531           | Gal $\beta$ 1-4GlcNAc $\beta$ 1-2 Man $\alpha$ 1-6(GlcNAc $\beta$ 1-4)(Gal $\beta$ 1-4GlcNAc $\beta$ 1-2Man $\alpha$ 1-3)Man $\beta$ 1-4GlcNAc $\beta$ 1-4(Fuc $\alpha$ 1-6)GlcNAc-Sp21                        | 2036        | 97                 |
| 353           | Gal $\beta$ 1-4GlcNAc $\beta$ 1-2Man $\alpha$ 1-6(Gal $\beta$ 1-4GlcNAc $\beta$ 1-2Man $\alpha$ 1-3)Man $\beta$ 1-4GlcNAc $\beta$ 1-4(Fuc $\alpha$ 1-6)GlcNAc $\beta$ -Sp22                                    | 1880        | 285                |
| 351           | Man $\alpha$ 1-6(Gal $\beta$ 1-4GlcNAc $\beta$ 1-2Man $\alpha$ 1-3)Man $\beta$ 1-4GlcNAc $\beta$ 1-4GlcNAc $\beta$ -Sp12                                                                                       | 1828        | 87                 |
| 398           | Gal $\beta$ 1-4GlcNAc $\beta$ 1-2Man $\alpha$ 1-6(GlcNAc $\beta$ 1-2Man $\alpha$ 1-3)Man $\beta$ 1-4GlcNAc $\beta$ 1-4GlcNAc-Sp12                                                                              | 1726        | 86                 |
| 428           | Gal $\beta$ 1-3GlcNAc $\beta$ 1-6(Gal $\beta$ 1-3GlcNAc $\beta$ 1-2)Man $\alpha$ 1-6(Gal $\beta$ 1-3GlcNAc $\beta$ 1-2Man $\alpha$ 1-3)Man $\beta$ 1-4GlcNAc $\beta$ 1-4GlcNAc $\beta$ -Sp19                   | 947         | 68                 |
| 53            | GlcNAc $\beta$ 1-2Man $\alpha$ 1-6(GlcNAc $\beta$ 1-2Man $\alpha$ 1-3)Man $\beta$ 1-4GlcNAc $\beta$ 1-4GlcNAc $\beta$ -Sp13                                                                                    | 838         | 137                |
| 452           | Neu5Ac $\alpha$ 2-8Neu5Ac $\alpha$ 2-3Gal $\beta$ 1-3GalNAc $\beta$ 1-4(Neu5Ac $\alpha$ 2-8Neu5Ac $\alpha$ 2-3)Gal $\beta$ 1-4Glc $\beta$ -Sp0                                                                 | 830         | 71                 |
| 354           | Gal $\beta$ 1-3GlcNAc $\beta$ 1-2Man $\alpha$ 1-6(Gal $\beta$ 1-3GlcNAc $\beta$ 1-2Man $\alpha$ 1-3)Man $\beta$ 1-4GlcNAc $\beta$ 1-4(Fuc $\alpha$ 1-6)GlcNAc $\beta$ -Sp22                                    | 712         | 294                |
| 319           | Gal $\beta$ 1-4GlcNAc $\beta$ 1-2Man $\alpha$ 1-6(Neu5Ac $\alpha$ 2-6Gal $\beta$ 1-4GlcNAc $\beta$ 1-2Man $\alpha$ 1-3)Man $\beta$ 1-4GlcNAc $\beta$ 1-4GlcNAc $\beta$ -Sp12                                   | 631         | 23                 |
| 350           | Gal $\beta$ 1-4GlcNAc $\beta$ 1-2Man $\alpha$ 1-6Man $\beta$ 1-4GlcNAc $\beta$ 1-4GlcNAc-Sp12                                                                                                                  | 544         | 108                |
| 364           | Gal $\beta$ 1-4GlcNAc $\beta$ 1-2Man $\alpha$ 1-6(Man $\alpha$ 1-3)Man $\beta$ 1-4GlcNAc $\beta$ 1-4GlcNAc $\beta$ -Sp12                                                                                       | 506         | 103                |
| 476           | Gal $\beta$ 1-3GlcNAc $\beta$ 1-2Man $\alpha$ 1-6(GlcNAc $\beta$ 1-4)(Gal $\beta$ 1-3GlcNAc $\beta$ 1-2Man $\alpha$ 1-3)Man $\beta$ 1-4GlcNAc $\beta$ 1-4GlcNAc $\beta$ -Sp21                                  | 373         | 54                 |
| 435           | Gal $\beta$ 1-4GlcNAc $\beta$ 1-2Man $\alpha$ 1-6(GlcNAc $\beta$ 1-4)(Gal $\beta$ 1-4GlcNAc $\beta$ 1-2Man $\alpha$ 1-3)Man $\beta$ 1-4GlcNAc $\beta$ 1-4GlcNAc-Sp21                                           | 366         | 104                |
| 437           | Gal $\beta$ 1-4GlcNAc $\beta$ 1-6(Gal $\beta$ 1-4GlcNAc $\beta$ 1-2)Man $\alpha$ 1-6(GlcNAc $\beta$ 1-4)(Gal $\beta$ 1-4GlcNAc $\beta$ 1-2Man $\alpha$ 1-3)Man $\beta$ 1-4GlcNAc $\beta$ 1-4GlcNAc-Sp21        | 294         | 30                 |
| 421           | GlcNAc $\beta$ 1-2(GlcNAc $\beta$ 1-6)Man $\alpha$ 1-6(GlcNAc $\beta$ 1-2Man $\alpha$ 1-3)Man $\beta$ 1-4GlcNAc $\beta$ 1-4GlcNAc $\beta$ -Sp19                                                                | 262         | 13                 |
| 52            | GlcNAc $\beta$ 1-2Man $\alpha$ 1-6(GlcNAc $\beta$ 1-2Man $\alpha$ 1-3)Man $\beta$ 1-4GlcNAc $\beta$ 1-4GlcNAc $\beta$ -Sp12                                                                                    | 255         | 88                 |

|     |                                                                                                                                                     |     |     |
|-----|-----------------------------------------------------------------------------------------------------------------------------------------------------|-----|-----|
| 369 | Galβ1-4GlcNAcβ1-2Manα1-6(Galβ1-4GlcNAcβ1-4(Galβ1-4GlcNAcβ1-2)Manα1-3)Manβ1-4GlcNAcβ1-4GlcNAc-Sp21                                                   | 254 | 10  |
| 387 | Galβ1-4GlcNAcβ1-6(Galβ1-4GlcNAcβ1-2)Manα1-6(Galβ1-4GlcNAcβ1-4(Galβ1-4GlcNAcβ1-2)Manα1-3)Manβ1-4GlcNAcβ1-4GlcNAcβ-Sp21                               | 219 | 22  |
| 524 | Galβ1-3GlcNAcβ1-2Manα-Sp0                                                                                                                           | 171 | 30  |
| 532 | Galβ1-4GlcNAcβ1-2 Manα1-6(Galβ1-4GlcNAcβ1-4)(Galβ1-4GlcNAcβ1-2Manα1-3)Manβ1-4GlcNAcβ1-4(Fucα1-6)GlcNAc-Sp21                                         | 171 | 125 |
| 541 | Galβ1-4GlcNAcβ1-3Galβ1-4GlcNAcβ1-2Manα1-6(Galβ1-4GlcNAcβ1-3Galβ1-4GlcNAcβ1-2Manα1-3)Manβ1-4GlcNAcβ1-4GlcNAcβ-Sp12                                   | 109 | 8   |
| 215 | Manα1-6(Manα1-3)Manα1-6(Manα1-2Manα1-3)Manβ1-4GlcNAcβ1-4GlcNAcβ-Sp12                                                                                | 106 | 19  |
| 474 | Neu5Acα2-3Galβ1-3GlcNAcβ1-6(Neu5Acα2-3Galβ1-3GlcNAcβ1-2)Manα1-6(Neu5Acα2-3Galβ1-3GlcNAcβ1-2Manα1-3)Manβ1-4GlcNAcβ1-4GlcNAcβ-Sp19                    | 105 | 22  |
| 526 | Neu5Acα2-3Galβ1-3GlcNAcβ1-2Manα-Sp0                                                                                                                 | 100 | 8   |
| 501 | Fucα1-2(6S)Galβ1-3(6S)GlcNAcβ-Sp0                                                                                                                   | 100 | 49  |
| 204 | GlcAβ1-6Galβ-Sp8                                                                                                                                    | 96  | 17  |
| 478 | Neu5Acα2-3Galβ1-4GlcNAcβ1-2Manα-Sp0                                                                                                                 | 92  | 18  |
| 547 | Galβ1-4GlcNAcβ1-3Galβ1-4GlcNAcβ1-3Galβ1-4GlcNAcβ1-2Manα1-6(Galβ1-4GlcNAcβ1-3Galβ1-4GlcNAcβ1-3Galβ1-4GlcNAcβ1-2Manα1-3)Manβ1-4GlcNAcβ1-4GlcNAcβ-Sp12 | 90  | 86  |
| 308 | Neu5Acα2-6Galβ1-4GlcNAcβ1-2Manα1-6(GlcNAcβ1-2Manα1-3)Manβ1-4GlcNAcβ1-4GlcNAcβ-Sp12                                                                  | 90  | 20  |
| 358 | KDNα2-3Galβ1-4Glc-Sp0                                                                                                                               | 88  | 30  |
| 365 | Fucα1-4(Galβ1-3)GlcNAcβ1-2Manα1-6(Fucα1-4(Galβ1-3)GlcNAcβ1-2Manα1-3)Manβ1-4GlcNAcβ1-4(Fucα1-6)GlcNAcβ-Sp22                                          | 88  | 36  |
| 418 | GalNAcα1-3(Fucα1-2)Galβ1-4(Fucα1-3)GlcNAcβ1-3GalNAc-Sp14                                                                                            | 79  | 28  |
| 217 | Manβ1-4GlcNAcβ-Sp0                                                                                                                                  | 79  | 24  |
| 56  | Neu5Acα2-6Galβ1-4GlcNAcβ1-2Manα1-6(Neu5Acα2-6Galβ1-4GlcNAcβ1-2Manα1-3)Manβ1-4GlcNAcβ1-4GlcNAcβ-Sp21                                                 | 75  | 4   |
| 249 | Neu5Acα2-3Galβ1-3GlcNAcβ-Sp0                                                                                                                        | 65  | 22  |
| 508 | Galβ1-4GlcNAcβ1-6(Galβ1-4GlcNAcβ1-2)Manα1-6(GlcNAcβ1-4)Galβ1-4GlcNAcβ1-4(Galβ1-4GlcNAcβ1-2)Manα1-3)Manβ1-4GlcNAcβ1-4(Fucα1-6)GlcNAc-Sp21            | 61  | 28  |
| 375 | Fucα1-4(Fucα1-2Galβ1-3)GlcNAcβ1-2Manα1-3(Fucα1-4(Fucα1-2Galβ1-3)GlcNAcβ1-2Manα1-3)Manβ1-4GlcNAcβ1-4GlcNAcβ-Sp19                                     | 60  | 14  |
| 372 | Galα1-3Galβ1-4(Fucα1-3)GlcNAcβ1-2Manα1-6(Galα1-3Galβ1-4(Fucα1-3)GlcNAcβ1-2Manα1-3)Manβ1-4GlcNAcβ1-4GlcNAcβ-Sp20                                     | 60  | 28  |
| 395 | Galα1-3Galβ1-3(Fucα1-4)GlcNAcβ1-2Manα1-6(Galα1-3Galβ1-3(Fucα1-4)GlcNAcβ1-2Manα1-3)Manβ1-4GlcNAcβ1-4GlcNAc-Sp19                                      | 59  | 25  |

|     |                                                                                                                                                                                                                                                                 |    |    |
|-----|-----------------------------------------------------------------------------------------------------------------------------------------------------------------------------------------------------------------------------------------------------------------|----|----|
| 475 | GlcNAc $\beta$ 1-6(GlcNAc $\beta$ 1-2)Man $\alpha$ 1-6(GlcNAc $\beta$ 1-2Man $\alpha$ 1-3)Man $\beta$ 1-4GlcNAc $\beta$ 1-4(Fuc $\alpha$ 1-6)GlcNAc $\beta$ -Sp24                                                                                               | 59 | 46 |
| 352 | GlcNAc $\beta$ 1-2Man $\alpha$ 1-6(GlcNAc $\beta$ 1-2Man $\alpha$ 1-3)Man $\beta$ 1-4GlcNAc $\beta$ 1-4(Fuc $\alpha$ 1-6)GlcNAc $\beta$ -Sp22                                                                                                                   | 57 | 8  |
| 416 | Fuc $\alpha$ 1-2Gal $\beta$ 1-4(Fuc $\alpha$ 1-3)GlcNAc $\beta$ 1-3GalNAc $\alpha$ -Sp14                                                                                                                                                                        | 56 | 17 |
| 533 | Fuc $\alpha$ 1-4(Gal $\beta$ 1-3)GlcNAc $\beta$ 1-2 Man $\alpha$ -Sp0                                                                                                                                                                                           | 56 | 5  |
| 449 | Fuc $\alpha$ 1-2Gal $\beta$ 1-4GlcNAc $\beta$ 1-6(Fuc $\alpha$ 1-2Gal $\beta$ 1-4GlcNAc $\beta$ 1-3)GalNAc-Sp14                                                                                                                                                 | 55 | 14 |
| 453 | GalNAc $\beta$ 1-4Gal $\beta$ 1-4Glc $\beta$ -Sp0                                                                                                                                                                                                               | 55 | 14 |
| 427 | Gal $\alpha$ 1-3(Fuc $\alpha$ 1-2)Gal $\beta$ 1-4GlcNAc $\beta$ 1-2Man $\alpha$ 1-6(Gal $\alpha$ 1-3(Fuc $\alpha$ 1-2)Gal $\beta$ 1-4GlcNAc $\beta$ 1-2Man $\alpha$ 1-3)Man $\beta$ 1-4GlcNAc $\beta$ 1-4(Fuc $\alpha$ 1-6)GlcNAc $\beta$ -Sp22                 | 55 | 27 |
| 469 | Glc $\alpha$ 1-6Glc $\alpha$ 1-6Glc $\alpha$ 1-6Glc $\beta$ -Sp10                                                                                                                                                                                               | 54 | 7  |
| 211 | Man $\alpha$ 1-2Man $\alpha$ 1-6(Man $\alpha$ 1-3)Man $\alpha$ 1-6(Man $\alpha$ 1-2Man $\alpha$ 1-2Man $\alpha$ 1-3)Man $\beta$ 1-4GlcNAc $\beta$ 1-4GlcNAc $\beta$ -Sp12                                                                                       | 54 | 5  |
| 480 | Neu5Ac $\alpha$ 2-6Gal $\beta$ 1-4GlcNAc $\beta$ 1-6GalNAc $\alpha$ -Sp14                                                                                                                                                                                       | 53 | 22 |
| 361 | Fuc $\alpha$ 1-2Gal $\beta$ 1-4GlcNAc $\beta$ 1-2Man $\alpha$ 1-6(Fuc $\alpha$ 1-2Gal $\beta$ 1-4GlcNAc $\beta$ 1-2Man $\alpha$ 1-3)Man $\beta$ 1-4GlcNAc $\beta$ 1-4GlcNAc $\beta$ -Sp20                                                                       | 52 | 13 |
| 342 | GlcNAc $\alpha$ 1-4Gal $\beta$ 1-4GlcNAc $\beta$ 1-3Gal $\beta$ 1-4(Fuc $\alpha$ 1-3)GlcNAc $\beta$ 1-3Gal $\beta$ 1-4(Fuc $\alpha$ 1-3)GlcNAc $\beta$ -Sp0                                                                                                     | 51 | 14 |
| 518 | (6P)Gal $\beta$ 1-4GlcNAc $\beta$ -SP0                                                                                                                                                                                                                          | 51 | 33 |
| 522 | Gal $\alpha$ 1-3(Fuc $\alpha$ 1-2)Gal $\beta$ 1-4GlcNAc $\beta$ 1-2Man $\alpha$ -Sp0                                                                                                                                                                            | 49 | 19 |
| 360 | Fuc $\alpha$ 1-2Gal $\beta$ 1-3GlcNAc $\beta$ 1-2Man $\alpha$ 1-6(Fuc $\alpha$ 1-2Gal $\beta$ 1-3GlcNAc $\beta$ 1-2Man $\alpha$ 1-3)Man $\beta$ 1-4GlcNAc $\beta$ 1-4GlcNAc $\beta$ -Sp20                                                                       | 49 | 6  |
| 412 | Neu5Ac $\alpha$ 2-3Gal $\beta$ 1-3GalNAc $\beta$ 1-4(Neu5Ac $\alpha$ 2-8Neu5Ac $\alpha$ 2-3)Gal $\beta$ 1-4Glc $\beta$ -Sp0                                                                                                                                     | 49 | 15 |
| 527 | Gal $\alpha$ 1-3Gal $\beta$ 1-3GlcNAc $\beta$ 1-2Man $\alpha$ -Sp0                                                                                                                                                                                              | 48 | 28 |
| 530 | GlcNAc $\beta$ 1-2 Man $\alpha$ 1-6(GlcNAc $\beta$ 1-4)(GlcNAc $\beta$ 1-2Man $\alpha$ 1-3)Man $\beta$ 1-4GlcNAc $\beta$ 1-4(Fuc $\alpha$ 1-6)GlcNAc-Sp21                                                                                                       | 48 | 19 |
| 55  | Neu5Ac $\alpha$ 2-6Gal $\beta$ 1-4GlcNAc $\beta$ 1-2Man $\alpha$ 1-6(Neu5Ac $\alpha$ 2-6Gal $\beta$ 1-4GlcNAc $\beta$ 1-2Man $\alpha$ 1-3)Man $\beta$ 1-4GlcNAc $\beta$ 1-4GlcNAc $\beta$ -Sp12                                                                 | 48 | 42 |
| 545 | GlcNAc $\beta$ 1-3Gal $\beta$ 1-4GlcNAc $\beta$ 1-3Gal $\beta$ 1-4GlcNAc $\beta$ 1-2Man $\alpha$ 1-6(GlcNAc $\beta$ 1-3Gal $\beta$ 1-4GlcNAc $\beta$ 1-3Gal $\beta$ 1-4GlcNAc $\beta$ 1-2Man $\alpha$ 1-3)Man $\beta$ 1-4GlcNAc $\beta$ 1-4GlcNAc $\beta$ -Sp12 | 48 | 17 |
| 426 | Fuc $\alpha$ 1-2Gal $\beta$ 1-3GlcNAc $\beta$ 1-2Man $\alpha$ 1-6(Fuc $\alpha$ 1-2Gal $\beta$ 1-3GlcNAc $\beta$ 1-2Man $\alpha$ 1-3)Man $\beta$ 1-4GlcNAc $\beta$ 1-4(Fuc $\alpha$ 1-6)GlcNAc $\beta$ -Sp22                                                     | 48 | 11 |
| 413 | Gal $\alpha$ 1-3(Fuc $\alpha$ 1-2)Gal $\beta$ 1-4GlcNAc $\beta$ 1-3GalNAc $\alpha$ -Sp14                                                                                                                                                                        | 46 | 25 |
| 450 | Gal $\alpha$ 1-3(Fuc $\alpha$ 1-2)Gal $\beta$ 1-4GlcNAc $\beta$ 1-6(Gal $\alpha$ 1-3(Fuc $\alpha$ 1-2)Gal $\beta$ 1-4GlcNAc $\beta$ 1-3)GalNAc-Sp14                                                                                                             | 46 | 30 |
| 423 | Gal $\alpha$ 1-3(Fuc $\alpha$ 1-2)Gal $\beta$ 1-3GlcNAc $\beta$ 1-3GalNAc-Sp14                                                                                                                                                                                  | 44 | 28 |
| 274 | Neu5Ac $\alpha$ 2-6Gal $\beta$ -Sp8                                                                                                                                                                                                                             | 44 | 19 |
| 467 | Gal $\alpha$ 1-3(Fuc $\alpha$ 1-2)Gal $\beta$ 1-3GalNAc $\alpha$ -Sp8                                                                                                                                                                                           | 43 | 6  |
| 313 | Man $\alpha$ 1-6Man $\beta$ -Sp10                                                                                                                                                                                                                               | 43 | 5  |
| 362 | Fuc $\alpha$ 1-2Gal $\beta$ 1-4(Fuc $\alpha$ 1-3)GlcNAc $\beta$ 1-2Man $\alpha$ 1-6(Fuc $\alpha$ 1-2Gal $\beta$ 1-4(Fuc $\alpha$ 1-3)GlcNAc $\beta$ 1-2Man $\alpha$ 1-3)Man $\beta$ 1-4GlcNAc $\beta$ 1-4GlcNAc $\beta$ -Sp20                                   | 42 | 21 |
| 229 | Neu5Ac $\alpha$ 2-8Neu5Ac $\alpha$ 2-8Neu5Ac $\alpha$ -Sp8                                                                                                                                                                                                      | 41 | 6  |
| 468 | Gal $\alpha$ 1-3(Fuc $\alpha$ 1-2)Gal $\beta$ 1-3GalNAc $\beta$ -Sp8                                                                                                                                                                                            | 41 | 13 |

|     |                                                                                                                                                                                                                                                                                                                                                                                                                                                                                                                                                                              |    |    |
|-----|------------------------------------------------------------------------------------------------------------------------------------------------------------------------------------------------------------------------------------------------------------------------------------------------------------------------------------------------------------------------------------------------------------------------------------------------------------------------------------------------------------------------------------------------------------------------------|----|----|
| 51  | Man $\alpha$ 1-6(Man $\alpha$ 1-3)Man $\beta$ 1-4GlcNAc $\beta$ 1-4GlcNAc $\beta$ -Sp13                                                                                                                                                                                                                                                                                                                                                                                                                                                                                      | 40 | 21 |
| 537 | Gal $\alpha$ 1-3(Fuc $\alpha$ 1-2)Gal $\beta$ 1-3GalNAc $\beta$ 1-3Gal $\alpha$ 1-4Gal $\beta$ 1-4Glc-Sp21                                                                                                                                                                                                                                                                                                                                                                                                                                                                   | 40 | 24 |
| 560 | Gal $\alpha$ 1-3Gal $\beta$ 1-4GlcNAc $\beta$ 1-2Man $\alpha$ 1-6(Gal $\alpha$ 1-3Gal $\beta$ 1-4GlcNAc $\beta$ 1-2Man $\alpha$ 1-3)Man $\beta$ 1-4GlcNAc $\beta$ 1-4GlcNAc-Sp24                                                                                                                                                                                                                                                                                                                                                                                             | 39 | 8  |
| 436 | Gal $\beta$ 1-4GlcNAc $\beta$ 1-2Man $\alpha$ 1-6(GlcNAc $\beta$ 1-4)(Gal $\beta$ 1-4GlcNAc $\beta$ 1-4(Gal $\beta$ 1-4GlcNAc $\beta$ 1-2)Man $\alpha$ 1-3)Man $\beta$ 1-4GlcNAc $\beta$ 1-4GlcNAc-Sp21                                                                                                                                                                                                                                                                                                                                                                      | 39 | 15 |
| 572 | Gal $\beta$ 1-3GlcNAc $\beta$ 1-3Gal $\beta$ 1-4GlcNAc $\beta$ 1-6(Gal $\beta$ 1-3GlcNAc $\beta$ 1-3Gal $\beta$ 1-4GlcNA $\beta$ 1-2)Man $\alpha$ 1-6(Gal $\beta$ 1-3GlcNAc $\beta$ 1-3Gal $\beta$ 1-4GlcNAc $\beta$ 1-2Man $\alpha$ 1-3)Man $\beta$ 1-4GlcNAc $\beta$ 1-4(Fuc $\alpha$ 1-6)GlcNAc $\beta$ -Sp24                                                                                                                                                                                                                                                             | 39 | 22 |
| 605 | Neu5Ac $\alpha$ 2-6Gal $\beta$ 1-4GlcNAc $\beta$ 1-3Gal $\beta$ 1-4GlcNAc $\beta$ 1-6(Neu5Ac $\alpha$ 2-6Gal $\beta$ 1-4GlcNAc $\beta$ 1-3Gal $\beta$ 1-4GlcNAc $\beta$ 1-3)GalNAc $\alpha$ -Sp14                                                                                                                                                                                                                                                                                                                                                                            | 39 | 18 |
| 402 | GalNAc $\alpha$ 1-3GalNAc $\beta$ 1-3Gal $\alpha$ 1-4Gal $\beta$ 1-4GlcNAc $\beta$ -Sp0                                                                                                                                                                                                                                                                                                                                                                                                                                                                                      | 38 | 18 |
| 371 | Gal $\alpha$ 1-3(Fuc $\alpha$ 1-2)Gal $\beta$ 1-4GlcNAc $\beta$ 1-2Man $\alpha$ 1-6(Gal $\alpha$ 1-3(Fuc $\alpha$ 1-2)Gal $\beta$ 1-4GlcNAc $\beta$ 1-2Man $\alpha$ 1-3)Man $\beta$ 1-4GlcNAc $\beta$ 1-4GlcNAc $\beta$ -Sp20                                                                                                                                                                                                                                                                                                                                                | 38 | 9  |
| 464 | Neu5Ac $\alpha$ 2-6Gal $\beta$ 1-4GlcNAc $\beta$ 1-4Man $\alpha$ 1-6(GlcNAc $\beta$ 1-4)(Neu5Ac $\alpha$ 2-6Gal $\beta$ 1-4GlcNAc $\beta$ 1-4(Neu5Ac $\alpha$ 2-6Gal $\beta$ 1-4GlcNAc $\beta$ 1-2)Man $\alpha$ 1-3)Man $\beta$ 1-4GlcNAc $\beta$ 1-4GlcNAc $\beta$ -Sp21                                                                                                                                                                                                                                                                                                    | 37 | 12 |
| 346 | Man $\alpha$ 1-6(Neu5Ac $\alpha$ 2-6Gal $\beta$ 1-4GlcNAc $\beta$ 1-2Man $\alpha$ 1-3)Man $\beta$ 1-4GlcNAc $\beta$ 1-4GlcNAc-Sp12                                                                                                                                                                                                                                                                                                                                                                                                                                           | 37 | 18 |
| 234 | Neu5Ac $\alpha$ 2-3Gal $\beta$ 1-3GalNAc $\beta$ 1-4(Neu5Ac $\alpha$ 2-3)Gal $\beta$ 1-4Glc $\beta$ -Sp0                                                                                                                                                                                                                                                                                                                                                                                                                                                                     | 37 | 11 |
| 298 | (6P)Glc $\beta$ -Sp10                                                                                                                                                                                                                                                                                                                                                                                                                                                                                                                                                        | 37 | 20 |
| 571 | Gal $\beta$ 1-3GlcNAc $\beta$ 1-3Gal $\beta$ 1-4GlcNAc $\beta$ 1-3Gal $\beta$ 1-4GlcNAc $\beta$ 1-6(Gal $\beta$ 1-3GlcNAc $\beta$ 1-3Gal $\beta$ 1-4GlcNAc $\beta$ 1-3Gal $\beta$ 1-4GlcNA $\beta$ 1-2)Man $\alpha$ 1-6(Gal $\beta$ 1-3GlcNAc $\beta$ 1-3Gal $\beta$ 1-4GlcNAc $\beta$ 1-3Gal $\beta$ 1-4GlcNAc $\beta$ 1-2Man $\alpha$ 1-3)Man $\beta$ 1-4GlcNAc $\beta$ 1-4(Fuc $\alpha$ 1-6)GlcNAc $\beta$ -Sp24                                                                                                                                                          | 36 | 12 |
| 394 | Gal $\alpha$ 1-3Gal $\beta$ 1-3GlcNAc $\beta$ 1-2Man $\alpha$ 1-6(Gal $\alpha$ 1-3Gal $\beta$ 1-3GlcNAc $\beta$ 1-2Man $\alpha$ 1-3)Man $\beta$ 1-4GlcNAc $\beta$ 1-4GlcNAc-Sp19                                                                                                                                                                                                                                                                                                                                                                                             | 36 | 11 |
| 363 | Gal $\alpha$ 1-3Gal $\beta$ 1-4GlcNAc $\beta$ 1-2Man $\alpha$ 1-6(Gal $\alpha$ 1-3Gal $\beta$ 1-4GlcNAc $\beta$ 1-2Man $\alpha$ 1-3)Man $\beta$ 1-4GlcNAc $\beta$ 1-4GlcNAc $\beta$ -Sp20                                                                                                                                                                                                                                                                                                                                                                                    | 36 | 4  |
| 379 | GalNAc $\beta$ 1-4GlcNAc $\beta$ 1-2Man $\alpha$ 1-6(GalNAc $\beta$ 1-4GlcNAc $\beta$ 1-2Man $\alpha$ 1-3)Man $\beta$ 1-4GlcNAc $\beta$ 1-4GlcNAc-Sp12                                                                                                                                                                                                                                                                                                                                                                                                                       | 36 | 13 |
| 451 | GalNAc $\alpha$ 1-3(Fuc $\alpha$ 1-2)Gal $\beta$ 1-4GlcNAc $\beta$ 1-6(GalNAc $\alpha$ 1-3(Fuc $\alpha$ 1-2)Gal $\beta$ 1-4GlcNAc $\beta$ 1-3)GalNAc-Sp14                                                                                                                                                                                                                                                                                                                                                                                                                    | 36 | 26 |
| 401 | Gal $\beta$ 1-4(Fuc $\alpha$ 1-3)GlcNAc $\beta$ 1-3GalNAc $\alpha$ -Sp14                                                                                                                                                                                                                                                                                                                                                                                                                                                                                                     | 35 | 16 |
| 41  | (6P)Man $\alpha$ -Sp8                                                                                                                                                                                                                                                                                                                                                                                                                                                                                                                                                        | 35 | 25 |
| 440 | Gal $\beta$ 1-6Gal $\beta$ -Sp10                                                                                                                                                                                                                                                                                                                                                                                                                                                                                                                                             | 35 | 39 |
| 587 | GlcNAc $\beta$ 1-3Gal $\beta$ 1-4GlcNAc $\beta$ 1-3Gal $\beta$ 1-4GlcNAc $\beta$ 1-3Gal $\beta$ 1-4GlcNAc $\beta$ 1-3Gal $\beta$ 1-4GlcNAc $\beta$ 1-6(GlcNAc $\beta$ 1-3Gal $\beta$ 1-4GlcNAc $\beta$ 1-3Gal $\beta$ 1-4GlcNAc $\beta$ 1-3Gal $\beta$ 1-4GlcNAc $\beta$ 1-3Gal $\beta$ 1-4GlcNAc $\beta$ 1-3Gal $\beta$ 1-4GlcNA $\beta$ 1-2)Man $\alpha$ 1-6(GlcNAc $\beta$ 1-3Gal $\beta$ 1-4GlcNAc $\beta$ 1-3Gal $\beta$ 1-4GlcNAc $\beta$ 1-3Gal $\beta$ 1-4GlcNAc $\beta$ 1-2Man $\alpha$ 1-3)Man $\beta$ 1-4GlcNAc $\beta$ 1-4(Fuc $\alpha$ 1-6)GlcNAc $\beta$ -Sp24 | 34 | 5  |
| 473 | Fuc $\alpha$ 1-2Gal $\beta$ 1-3(Fuc $\alpha$ 1-4)GlcNAc $\beta$ 1-2Man $\alpha$ 1-6(Fuc $\alpha$ 1-2Gal $\beta$ 1-3(Fuc $\alpha$ 1-4)GlcNAc $\beta$ 1-2Man $\alpha$ 1-3)Man $\beta$ 1-4GlcNAc $\beta$ 1-4(Fuc $\alpha$ 1-6)GlcNAc $\beta$ 1-4(Fuc $\alpha$ 1-6)GlcNAc $\beta$ -Sp19                                                                                                                                                                                                                                                                                          | 33 | 12 |
| 388 | GlcNAc $\beta$ 1-2Man $\alpha$ 1-6(GlcNAc $\beta$ 1-4(GlcNAc $\beta$ 1-2)Man $\alpha$ 1-3)Man $\beta$ 1-4GlcNAc $\beta$ 1-4GlcNAc-Sp21                                                                                                                                                                                                                                                                                                                                                                                                                                       | 33 | 20 |
| 590 | Gal $\beta$ 1-4GlcNAc $\beta$ 1-3Gal $\beta$ 1-4GlcNAc $\beta$ 1-6(Gal $\beta$ 1-3)GalNAc $\alpha$ -Sp14                                                                                                                                                                                                                                                                                                                                                                                                                                                                     | 33 | 15 |

|     |                                                                                                                                                                                                                                                                                                                                     |    |    |
|-----|-------------------------------------------------------------------------------------------------------------------------------------------------------------------------------------------------------------------------------------------------------------------------------------------------------------------------------------|----|----|
| 138 | Neu5Ac $\alpha$ 2-6(Gal $\beta$ 1-3)GlcNAc $\beta$ 1-4Gal $\beta$ 1-4Glc $\beta$ -Sp10                                                                                                                                                                                                                                              | 33 | 17 |
| 115 | Gal $\alpha$ 1-3Gal $\beta$ 1-4GlcNAc $\beta$ -Sp8                                                                                                                                                                                                                                                                                  | 32 | 21 |
| 370 | GalNAc $\alpha$ 1-3(Fuc $\alpha$ 1-2)Gal $\beta$ 1-4GlcNAc $\beta$ 1-2Man $\alpha$ 1-6(GalNAc $\alpha$ 1-3(Fuc $\alpha$ 1-2)Gal $\beta$ 1-4GlcNAc $\beta$ 1-2Man $\alpha$ 1-3)Man $\beta$ 1-4GlcNAc $\beta$ 1-4GlcNAc $\beta$ -Sp20                                                                                                 | 32 | 10 |
| 389 | Fuc $\alpha$ 1-2Gal $\beta$ 1-3GalNAc $\alpha$ 1-3(Fuc $\alpha$ 1-2)Gal $\beta$ 1-4Glc $\beta$ -Sp0                                                                                                                                                                                                                                 | 32 | 9  |
| 202 | GlcA $\beta$ -Sp8                                                                                                                                                                                                                                                                                                                   | 32 | 14 |
| 575 | Gal $\beta$ 1-4GlcNAc $\beta$ 1-3Gal $\beta$ 1-4GlcNAc $\beta$ 1-2Man $\alpha$ 1-6(Gal $\beta$ 1-4GlcNAc $\beta$ 1-3Gal $\beta$ 1-4GlcNAc $\beta$ 1-2Man $\alpha$ 1-3)Man $\beta$ 1-4GlcNAc $\beta$ 1-4(Fuc $\alpha$ 1-6)GlcNAc $\beta$ -Sp24                                                                                       | 32 | 13 |
| 582 | Gal $\beta$ 1-4GlcNAc $\beta$ 1-3Gal $\beta$ 1-4GlcNAc $\beta$ 1-6(Gal $\beta$ 1-4GlcNAc $\beta$ 1-3Gal $\beta$ 1-4GlcNA $\beta$ 1-2)Man $\alpha$ 1-6(Gal $\beta$ 1-4GlcNAc $\beta$ 1-3Gal $\beta$ 1-4GlcNAc $\beta$ 1-2Man $\alpha$ 1-3)Man $\beta$ 1-4GlcNAc $\beta$ 1-4(Fuc $\alpha$ 1-6)GlcNAc $\beta$ -Sp24                    | 31 | 14 |
| 411 | Gal $\beta$ 1-3GalNAc $\beta$ 1-4(Neu5Ac $\alpha$ 2-8Neu5Ac $\alpha$ 2-3)Gal $\beta$ 1-4Glc $\beta$ -Sp0                                                                                                                                                                                                                            | 31 | 21 |
| 431 | GlcNAc $\beta$ 1-2Man $\alpha$ 1-6(GlcNAc $\beta$ 1-4)(GlcNAc $\beta$ 1-2Man $\alpha$ 1-3)Man $\beta$ 1-4GlcNAc $\beta$ 1-4GlcNAc-Sp21                                                                                                                                                                                              | 31 | 22 |
| 136 | Neu5Ac $\alpha$ 2-6(Gal $\beta$ 1-3)GalNAc $\alpha$ -Sp14                                                                                                                                                                                                                                                                           | 31 | 14 |
| 472 | Fuc $\alpha$ 1-2Gal $\beta$ 1-4(Fuc $\alpha$ 1-3)GlcNAc $\beta$ 1-2Man $\alpha$ 1-6(Fuc $\alpha$ 1-2Gal $\beta$ 1-4(Fuc $\alpha$ 1-3)GlcNAc $\beta$ 1-2Man $\alpha$ 1-3)Man $\beta$ 1-4GlcNAc $\beta$ 1-4(Fuc $\alpha$ 1-6)GlcNAc $\beta$ -Sp24                                                                                     | 30 | 9  |
| 83  | GalNAc $\alpha$ 1-3(Fuc $\alpha$ 1-2)Gal $\beta$ 1-4(Fuc $\alpha$ 1-3)GlcNAc $\beta$ -Sp0                                                                                                                                                                                                                                           | 30 | 22 |
| 455 | Gal $\alpha$ 1-3(Fuc $\alpha$ 1-2)Gal $\beta$ 1-3GlcNAc $\beta$ 1-2Man $\alpha$ 1-6(Gal $\alpha$ 1-3(Fuc $\alpha$ 1-2)Gal $\beta$ 1-3GlcNAc $\beta$ 1-2Man $\alpha$ 1-3)Man $\beta$ 1-4GlcNAc $\beta$ 1-4(Fuc $\alpha$ 1-6)GlcNAc $\beta$ -Sp22                                                                                     | 30 | 22 |
| 139 | Gal $\beta$ 1-3GalNAc $\alpha$ -Sp8                                                                                                                                                                                                                                                                                                 | 30 | 28 |
| 104 | Gal $\alpha$ 1-3(Fuc $\alpha$ 1-2)Gal $\beta$ 1-4(Fuc $\alpha$ 1-3)GlcNAc $\beta$ -Sp8                                                                                                                                                                                                                                              | 30 | 15 |
| 607 | Neu5Ac $\alpha$ 2-3Gal $\beta$ 1-4GlcNAc $\beta$ 1-3Gal $\beta$ 1-4GlcNAc $\beta$ 1-3Gal $\beta$ 1-4GlcNAc $\beta$ 1-2Man $\alpha$ 1-6(Neu5Ac $\alpha$ 2-3Gal $\beta$ 1-4GlcNAc $\beta$ 1-3Gal $\beta$ 1-4GlcNAc $\beta$ 1-3Gal $\beta$ 1-4GlcNAc $\beta$ 1-2Man $\alpha$ 1-3)Man $\beta$ 1-4GlcNAc $\beta$ 1-4GlcNAc $\beta$ -Sp12 | 30 | 15 |
| 403 | Gal $\alpha$ 1-4Gal $\beta$ 1-3GlcNAc $\beta$ 1-2Man $\alpha$ 1-6(Gal $\alpha$ 1-4Gal $\beta$ 1-3GlcNAc $\beta$ 1-2Man $\alpha$ 1-3)Man $\beta$ 1-4GlcNAc $\beta$ 1-4GlcNAc $\beta$ -Sp19                                                                                                                                           | 30 | 27 |
| 205 | KDN $\alpha$ 2-3Gal $\beta$ 1-3GlcNAc $\beta$ -Sp0                                                                                                                                                                                                                                                                                  | 30 | 14 |
| 430 | Fuc $\alpha$ 1-3GlcNAc $\beta$ 1-6(Gal $\beta$ 1-4GlcNAc $\beta$ 1-3)Gal $\beta$ 1-4Glc-Sp21                                                                                                                                                                                                                                        | 30 | 7  |
| 132 | Gal $\beta$ 1-4GlcNAc $\beta$ 1-6GalNAc-Sp14                                                                                                                                                                                                                                                                                        | 29 | 9  |
| 264 | Neu5Ac $\alpha$ 2-3Gal $\beta$ 1-4Glc $\beta$ -Sp8                                                                                                                                                                                                                                                                                  | 29 | 7  |
| 454 | GalNAc $\alpha$ 1-3(Fuc $\alpha$ 1-2)Gal $\beta$ 1-4GlcNAc $\beta$ 1-2Man $\alpha$ 1-6(GalNAc $\alpha$ 1-3(Fuc $\alpha$ 1-2)Gal $\beta$ 1-4GlcNAc $\beta$ 1-2Man $\alpha$ 1-3)Man $\beta$ 1-4GlcNAc $\beta$ 1-4(Fuc $\alpha$ 1-6)GlcNAc $\beta$ -Sp22                                                                               | 29 | 6  |
| 24  | (3S)Gal $\beta$ 1-4(Fuc $\alpha$ 1-3)(6S)Glc-Sp0                                                                                                                                                                                                                                                                                    | 29 | 17 |
| 82  | GalNAc $\alpha$ 1-3(Fuc $\alpha$ 1-2)Gal $\beta$ 1-3GlcNAc $\beta$ -Sp0                                                                                                                                                                                                                                                             | 29 | 16 |
| 549 | GlcNAc $\beta$ 1-3Gal $\beta$ 1-4GlcNAc $\beta$ 1-3Gal $\beta$ 1-4GlcNAc $\beta$ 1-3Gal $\beta$ 1-4GlcNAc $\beta$ 1-2Man $\alpha$ 1-6(GlcNAc $\beta$ 1-3Gal $\beta$ 1-4GlcNAc $\beta$ 1-3Gal $\beta$ 1-4GlcNAc $\beta$ 1-3Gal $\beta$ 1-4GlcNAc $\beta$ 1-2Man $\alpha$ 1-3)Man $\beta$ 1-4GlcNAc $\beta$ 1-4GlcNAc $\beta$ -Sp25   | 28 | 16 |
| 492 | (3S)Gal $\beta$ 1-3(Fuc $\alpha$ 1-4)GlcNAc $\beta$ -Sp0                                                                                                                                                                                                                                                                            | 28 | 3  |
| 422 | Fuc $\alpha$ 1-2Gal $\beta$ 1-3GlcNAc $\beta$ 1-3GalNAc-Sp14                                                                                                                                                                                                                                                                        | 28 | 6  |



|     |                                                                                                                                                                                              |    |    |
|-----|----------------------------------------------------------------------------------------------------------------------------------------------------------------------------------------------|----|----|
| 407 | Galβ1-3GlcNAcα1-6Galβ1-4GlcNAcβ-Sp0                                                                                                                                                          | 28 | 29 |
| 291 | Galβ1-4(Fucα1-3)(6S)Glcβ-Sp0                                                                                                                                                                 | 28 | 16 |
| 244 | Neu5Acα2-6(Neu5Acα2-3Galβ1-3)GalNAcα-Sp14                                                                                                                                                    | 28 | 16 |
| 286 | Neu5Gcα2-6Galβ1-4GlcNAcβ-Sp0                                                                                                                                                                 | 27 | 18 |
| 446 | Fucα1-2Galβ1-4(Fucα1-3)GlcNAcβ1-2Manα1-6(Fucα1-2Galβ1-4(Fucα1-3)GlcNAcβ1-4(Fucα1-2Galβ1-4(Fucα1-3)GlcNAcβ1-2)Manα1-3)Manβ1-4GlcNAcβ1-4GlcNAcβ-Sp12                                           | 27 | 6  |
| 328 | Neu5,9Ac2α2-3Galβ1-4GlcNAcβ-Sp0                                                                                                                                                              | 27 | 24 |
| 425 | Galα1-3Galβ1-3GlcNAcβ1-3GalNAc-Sp14                                                                                                                                                          | 26 | 11 |
| 546 | GlcNAcβ1-3Galβ1-4GlcNAcβ1-3Galβ1-4GlcNAcβ1-2Manα1-6(GlcNAcβ1-3Galβ1-4GlcNAcβ1-3Galβ1-4GlcNAcβ1-2Manα1-3)Manβ1-4GlcNAcβ1-4GlcNAcβ-Sp25                                                        | 26 | 13 |
| 517 | Galβ1-4(6P)GlcNAcβ-Sp0                                                                                                                                                                       | 26 | 23 |
| 81  | Fucβ1-3GlcNAcβ-Sp8                                                                                                                                                                           | 26 | 5  |
| 591 | Galβ1-4GlcNAcβ1-3Galβ1-4GlcNAcβ1-6(Galβ1-4GlcNAcβ1-3Galβ1-4GlcNAcβ1-3)GalNAcα-Sp14                                                                                                           | 26 | 11 |
| 414 | GalNAcα1-3(Fucα1-2)Galβ1-4GlcNAcβ1-3GalNAcα-Sp14                                                                                                                                             | 26 | 35 |
| 125 | Galβ1-2Galβ-Sp8                                                                                                                                                                              | 26 | 3  |
| 583 | GlcNAcβ1-3Galβ1-4GlcNAcβ1-3Galβ1-4GlcNAcβ1-6(GlcNAcβ1-3Galβ1-4GlcNAcβ1-3Galβ1-4GlcNAcβ1-2)Manα1-6(GlcNAcβ1-3Galβ1-4GlcNAcβ1-3Galβ1-4GlcNAcβ1-2Manα1-3)Manβ1-4GlcNAcβ1-4(Fucα1-6)GlcNAcβ-Sp24 | 25 | 9  |
| 586 | Galβ1-4GlcNAcβ1-3Galβ1-4GlcNAcβ1-3Galβ1-4GlcNAcβ1-6(Galβ1-4GlcNAcβ1-3Galβ1-4GlcNAcβ1-3Galβ1-4GlcNAcβ1-3Galβ1-4GlcNAcβ1-3Galβ1-4GlcNAcβ1-2Manα1-3)Manβ1-4GlcNAcβ1-4(Fucα1-6)GlcNAcβ-Sp24      | 25 | 9  |
| 257 | Neu5Acα2-3Galβ1-4(Fucα1-3)GlcNAcβ1-3Galβ1-4GlcNAcβ-Sp8                                                                                                                                       | 25 | 23 |
| 392 | GalNAcβ1-4(Neu5Acα2-3)Galβ1-4GlcNAcβ1-3GalNAcα-Sp14                                                                                                                                          | 25 | 18 |
| 448 | Galβ1-4GlcNAcβ1-2Manα-Sp0                                                                                                                                                                    | 25 | 11 |
| 456 | Neu5Acα2-6Galβ1-4GlcNAcβ1-6(Fucα1-2Galβ1-3GlcNAcβ1-3)Galβ1-4Glc-Sp21                                                                                                                         | 24 | 10 |
| 457 | GalNAcα1-3(Fucα1-2)Galβ1-3GlcNAcβ1-2Manα1-6(GalNAcα1-3(Fucα1-2)Galβ1-3GlcNAcβ1-2Manα1-3)Manβ1-4GlcNAcβ1-4(Fucα1-6)GlcNAcβ-Sp22                                                               | 24 | 2  |
| 497 | Fucα1-2(6S)Galβ1-3GlcNAcβ-Sp0                                                                                                                                                                | 24 | 5  |
| 564 | GlcNAcβ1-3Galβ1-4GlcNAcβ1-3Galβ1-4GlcNAcβ1-3Galβ1-4GlcNAcβ1-2Manα1-6(GlcNAcβ1-3Galβ1-4GlcNAcβ1-3Galβ1-4GlcNAcβ1-3Galβ1-4GlcNAcβ1-2Manα1-3)Manβ1-4GlcNAcβ1-4GlcNAcβ-Sp25                      | 24 | 5  |
| 544 | Fucα1-2Galβ1-4GlcNAcβ1-3Galβ1-4GlcNAcβ1-2Manα1-6(Fucα1-2Galβ1-4GlcNAcβ1-3Galβ1-4GlcNAcβ1-2Manα1-3)Manβ1-4GlcNAcβ1-4GlcNAcβ-Sp24                                                              | 24 | 7  |
| 7   | Fucα-Sp9                                                                                                                                                                                     | 23 | 24 |
| 470 | Glcα1-4Glcα1-4Glcα1-4Glcβ-Sp10                                                                                                                                                               | 23 | 16 |

|     |                                                                                                                                                                                                                                          |    |    |
|-----|------------------------------------------------------------------------------------------------------------------------------------------------------------------------------------------------------------------------------------------|----|----|
| 559 | Galβ1-4GlcNAcβ1-3Galβ1-4GlcNAcβ1-6(Galβ1-4GlcNAcβ1-3Galβ1-4GlcNAcβ1-2)Manα1-6(Galβ1-4GlcNAcβ1-3Galβ1-4GlcNAcβ1-2Manα1-3)Manα1-4GlcNAcβ1-4GlcNAc-Sp24                                                                                     | 23 | 31 |
| 574 | GlcNAcβ1-3Galβ1-4GlcNAcβ1-2Manα1-6(GlcNAcβ1-3Galβ1-4GlcNAcβ1-2Manα1-3)Manβ1-4GlcNAcβ1-4(Fuca1-6)GlcNAcβ-Sp24                                                                                                                             | 23 | 13 |
| 12  | Galβ-Sp8                                                                                                                                                                                                                                 | 23 | 18 |
| 161 | Galβ1-4GlcNAcβ1-3Galβ1-4(Fuca1-3)GlcNAcβ1-3Galβ1-4(Fuca1-3)GlcNAcβ-Sp0                                                                                                                                                                   | 23 | 4  |
| 42  | (6S)Galβ1-4Glcβ-Sp0                                                                                                                                                                                                                      | 23 | 6  |
| 399 | Neu5Acα2-3Galβ1-3GlcNAcβ1-3GalNAcα-Sp14                                                                                                                                                                                                  | 23 | 24 |
| 438 | Galβ1-4GlcNAcβ1-6(Galβ1-4GlcNAcβ1-2)Manα1-6(GlcNAcβ1-4)(Galβ1-4GlcNAcβ1-4(Galβ1-4GlcNAcβ1-2)Manα1-3)Manβ1-4GlcNAcβ1-4GlcNAc-Sp21                                                                                                         | 23 | 12 |
| 96  | GalNAcβ1-3Galα1-4Galβ1-4GlcNAcβ-Sp0                                                                                                                                                                                                      | 23 | 7  |
| 568 | Galβ1-4GlcNAcβ1-3Galβ1-4GlcNAcβ1-3Galβ1-4GlcNAcβ1-3Galβ1-4GlcNAcβ1-3Galβ1-4GlcNAcβ1-3Galβ1-4GlcNAcβ1-2Manα1-6(Galβ1-4GlcNAcβ1-3Galβ1-4GlcNAcβ1-3Galβ1-4GlcNAcβ1-3Galβ1-4GlcNAcβ1-3Galβ1-4GlcNAcβ1-2Manα1-3)Manβ1-4GlcNAcβ1-4GlcNAcβ-Sp25 | 23 | 11 |
| 580 | GlcNAcβ1-3Galβ1-4GlcNAcβ1-3Galβ1-4GlcNAcβ1-3Galβ1-4GlcNAcβ1-3Galβ1-4GlcNAcβ1-2Manα1-6(GlcNAcβ1-3Galβ1-4GlcNAcβ1-3Galβ1-4GlcNAcβ1-3Galβ1-4GlcNAcβ1-2Manα1-3)Manβ1-4GlcNAcβ1-4(Fuca1-6)GlcNAcβ-Sp19                                        | 22 | 5  |
| 170 | Galβ1-4GlcNAcβ-Sp23                                                                                                                                                                                                                      | 22 | 17 |
| 284 | Neu5Gcα2-3Galβ1-4Glcβ-Sp0                                                                                                                                                                                                                | 22 | 12 |
| 241 | Neu5Acα2-3Galβ1-4(Neu5Acα2-3Galβ1-3)GlcNAcβ-Sp8                                                                                                                                                                                          | 22 | 7  |
| 345 | Neu5Acα2-6Galβ1-4GlcNAcβ1-2Manα1-6(Manα1-3)Manβ1-4GlcNAcβ1-4GlcNAc-Sp12                                                                                                                                                                  | 22 | 19 |
| 356 | KDNα2-3Galβ1-4(Fuca1-3)GlcNAc-Sp0                                                                                                                                                                                                        | 22 | 3  |
| 584 | Galβ1-4GlcNAcβ1-3Galβ1-4GlcNAcβ1-3Galβ1-4GlcNAcβ1-6(Galβ1-4GlcNAcβ1-3Galβ1-4GlcNAcβ1-3Galβ1-4GlcNAcβ1-2)Manα1-6(Galβ1-4GlcNAcβ1-3Galβ1-4GlcNAcβ1-3Galβ1-4GlcNAcβ1-2Manα1-3)Manβ1-4GlcNAcβ1-4(Fuca1-6)GlcNAcβ-Sp24                        | 22 | 7  |
| 118 | Galα1-3Galβ-Sp8                                                                                                                                                                                                                          | 22 | 6  |
| 400 | Fuca1-2Galβ1-4GlcNAcβ1-3GalNAcα-Sp14                                                                                                                                                                                                     | 22 | 13 |
| 447 | Galβ1-4(Fuca1-3)GlcNAcβ1-6GalNAc-Sp14                                                                                                                                                                                                    | 22 | 18 |
| 577 | Galβ1-4GlcNAcβ1-3Galβ1-4GlcNAcβ1-3Galβ1-4GlcNAcβ1-2Manα1-6(Galβ1-4GlcNAcβ1-3Galβ1-4GlcNAcβ1-3Galβ1-4GlcNAcβ1-2Manα1-3)Manβ1-4GlcNAcβ1-4(Fuca1-6)GlcNAcβ-Sp24                                                                             | 22 | 24 |
| 288 | Neu5Acα2-3Galβ1-4GlcNAcβ1-6(Galβ1-3)GalNAcα-Sp14                                                                                                                                                                                         | 21 | 14 |
| 578 | GlcNAcβ1-3Galβ1-4GlcNAcβ1-3Galβ1-4GlcNAcβ1-3Galβ1-4GlcNAcβ1-2Manα1-6(GlcNAcβ1-3Galβ1-4GlcNAcβ1-3Galβ1-4GlcNAcβ1-3Galβ1-4GlcNAcβ1-2Manα1-3)Manβ1-4GlcNAcβ1-4(Fuca1-6)GlcNAcβ-Sp24                                                         | 21 | 14 |
| 490 | Galβ1-3(Fuca1-4)GlcNAcβ1-6GalNAcα-Sp14                                                                                                                                                                                                   | 21 | 4  |
| 9   | Neu5Acα-Sp8                                                                                                                                                                                                                              | 21 | 10 |

|     |                                                                                                                                                                                                                                                                                                                                                                                   |    |    |
|-----|-----------------------------------------------------------------------------------------------------------------------------------------------------------------------------------------------------------------------------------------------------------------------------------------------------------------------------------------------------------------------------------|----|----|
| 417 | Gal $\alpha$ 1-3(Fuc $\alpha$ 1-2)Gal $\beta$ 1-4(Fuc $\alpha$ 1-3)GlcNAc $\beta$ 1-3GalNAc-Sp14                                                                                                                                                                                                                                                                                  | 21 | 17 |
| 305 | Gal $\beta$ 1-4GlcNAc $\beta$ 1-6Gal $\beta$ 1-4GlcNAc $\beta$ -Sp0                                                                                                                                                                                                                                                                                                               | 21 | 9  |
| 601 | Neu5Ac $\alpha$ 2-6Gal $\beta$ 1-4GlcNAc $\beta$ 1-3Gal $\beta$ 1-4GlcNAc $\beta$ 1-6(Gal $\beta$ 1-3)GalNAc $\alpha$ -Sp14                                                                                                                                                                                                                                                       | 21 | 14 |
| 419 | Gal $\beta$ 1-4(Fuc $\alpha$ 1-3)GlcNAc $\beta$ 1-2Man $\alpha$ 1-6(Gal $\beta$ 1-4(Fuc $\alpha$ 1-3)GlcNAc $\beta$ 1-2Man $\alpha$ 1-3)Man $\beta$ 1-4GlcNAc $\beta$ 1-4(Fuc $\alpha$ 1-6)GlcNAc $\beta$ -Sp22                                                                                                                                                                   | 21 | 10 |
| 520 | Neu5Ac $\alpha$ 2-6Gal $\beta$ 1-4GlcNAc $\beta$ 1-2Man-Sp0                                                                                                                                                                                                                                                                                                                       | 21 | 8  |
| 374 | Gal $\alpha$ 1-3(Fuc $\alpha$ 1-2)Gal $\beta$ 1-3GlcNAc $\beta$ 1-2Man $\alpha$ 1-6(Gal $\alpha$ 1-3(Fuc $\alpha$ 1-2)Gal $\beta$ 1-3GlcNAc $\beta$ 1-2Man $\alpha$ 1-3)Man $\beta$ 1-4GlcNAc $\beta$ 1-4GlcNAc $\beta$ -Sp20                                                                                                                                                     | 20 | 8  |
| 240 | Neu5Ac $\alpha$ 2-3Gal $\beta$ 1-3(Fuc $\alpha$ 1-4)GlcNAc $\beta$ 1-3Gal $\beta$ 1-4(Fuc $\alpha$ 1-3)GlcNAc $\beta$ -Sp0                                                                                                                                                                                                                                                        | 20 | 13 |
| 299 | Neu5Ac $\alpha$ 2-3Gal $\beta$ 1-4(Fuc $\alpha$ 1-3)GlcNAc $\beta$ 1-6(Gal $\beta$ 1-3)GalNAc $\alpha$ -Sp14                                                                                                                                                                                                                                                                      | 20 | 6  |
| 570 | (3S)GlcA $\beta$ 1-3Gal $\beta$ 1-4GlcNAc $\beta$ 1-2Man $\alpha$ -Sp0                                                                                                                                                                                                                                                                                                            | 20 | 7  |
| 121 | Gal $\alpha$ 1-4Gal $\beta$ 1-4GlcNAc $\beta$ -Sp8                                                                                                                                                                                                                                                                                                                                | 20 | 16 |
| 122 | Gal $\alpha$ 1-4Gal $\beta$ 1-4Glc $\beta$ -Sp0                                                                                                                                                                                                                                                                                                                                   | 20 | 3  |
| 280 | Neu5Gc $\alpha$ 2-3Gal $\beta$ 1-3(Fuc $\alpha$ 1-4)GlcNAc $\beta$ -Sp0                                                                                                                                                                                                                                                                                                           | 19 | 5  |
| 336 | GalNAc $\alpha$ 1-3(Fuc $\alpha$ 1-2)Gal $\beta$ 1-4GlcNAc $\beta$ 1-3Gal $\beta$ 1-4GlcNAc $\beta$ 1-3Gal $\beta$ 1-4GlcNAc $\beta$ -Sp0                                                                                                                                                                                                                                         | 19 | 8  |
| 307 | GlcA $\beta$ 1-3GlcNAc $\beta$ -Sp8                                                                                                                                                                                                                                                                                                                                               | 19 | 5  |
| 442 | GalNAc $\beta$ 1-6GalNAc $\beta$ -Sp8                                                                                                                                                                                                                                                                                                                                             | 19 | 13 |
| 203 | GlcA $\beta$ 1-3Gal $\beta$ -Sp8                                                                                                                                                                                                                                                                                                                                                  | 19 | 7  |
| 494 | Fuc $\alpha$ 1-2Gal $\beta$ 1-4GlcNAc $\beta$ 1-6GalNAc $\alpha$ -Sp14                                                                                                                                                                                                                                                                                                            | 19 | 0  |
| 543 | Neu5Gc $\alpha$ 2-3Gal $\beta$ 1-4GlcNAc $\beta$ 1-3Gal $\beta$ 1-4GlcNAc $\beta$ 1-2Man $\alpha$ 1-6(Neu5Gc $\alpha$ 2-3Gal $\beta$ 1-4GlcNAc $\beta$ 1-3Gal $\beta$ 1-4GlcNAc $\beta$ 1-2Man $\alpha$ 1-3)Man $\beta$ 1-4GlcNAc $\beta$ 1-4GlcNAc $\beta$ -Sp24                                                                                                                 | 19 | 8  |
| 153 | Gal $\beta$ 1-4(Fuc $\alpha$ 1-3)GlcNAc $\beta$ 1-3Gal $\beta$ 1-4(Fuc $\alpha$ 1-3)GlcNAc $\beta$ -Sp0                                                                                                                                                                                                                                                                           | 19 | 7  |
| 567 | Gal $\beta$ 1-3GlcNAc $\beta$ 1-6(Gal $\beta$ 1-3)GalNAc-Sp14                                                                                                                                                                                                                                                                                                                     | 19 | 12 |
| 391 | Gal $\beta$ 1-3GlcNAc $\beta$ 1-3GalNAc $\alpha$ -Sp14                                                                                                                                                                                                                                                                                                                            | 19 | 6  |
| 271 | Neu5Ac $\alpha$ 2-6Gal $\beta$ 1-4GlcNAc $\beta$ 1-3Gal $\beta$ 1-4GlcNAc $\beta$ -Sp0                                                                                                                                                                                                                                                                                            | 19 | 12 |
| 281 | Neu5Gc $\alpha$ 2-3Gal $\beta$ 1-3GlcNAc $\beta$ -Sp0                                                                                                                                                                                                                                                                                                                             | 18 | 10 |
| 579 | Gal $\beta$ 1-4GlcNAc $\beta$ 1-3Gal $\beta$ 1-4GlcNAc $\beta$ 1-3Gal $\beta$ 1-4GlcNAc $\beta$ 1-3Gal $\beta$ 1-4GlcNAc $\beta$ 1-2Man $\alpha$ 1-6(Gal $\beta$ 1-4GlcNAc $\beta$ 1-3Gal $\beta$ 1-4GlcNAc $\beta$ 1-3Gal $\beta$ 1-4GlcNAc $\beta$ 1-3Gal $\beta$ 1-4GlcNAc $\beta$ 1-2Man $\alpha$ 1-3)Man $\beta$ 1-4GlcNAc $\beta$ 1-4(Fuc $\alpha$ 1-6)GlcNAc $\beta$ -Sp24 | 18 | 8  |
| 554 | Neu5Gc $\alpha$ 2-8Neu5Ac $\alpha$ 2-3Gal $\beta$ 1-4GlcNAc-Sp0                                                                                                                                                                                                                                                                                                                   | 18 | 4  |
| 200 | G-ol-Sp8                                                                                                                                                                                                                                                                                                                                                                          | 18 | 6  |
| 114 | Gal $\alpha$ 1-3Gal $\beta$ 1-3GlcNAc $\beta$ -Sp0                                                                                                                                                                                                                                                                                                                                | 18 | 11 |
| 443 | (6S)Gal $\beta$ 1-3GlcNAc $\beta$ -Sp0                                                                                                                                                                                                                                                                                                                                            | 18 | 17 |
| 195 | Glc $\alpha$ 1-4Glc $\beta$ -Sp8                                                                                                                                                                                                                                                                                                                                                  | 18 | 6  |

|     |                                                                                                                                                                                                                                                                                                                                                                                                                                                                                                                                                                                                                            |    |    |
|-----|----------------------------------------------------------------------------------------------------------------------------------------------------------------------------------------------------------------------------------------------------------------------------------------------------------------------------------------------------------------------------------------------------------------------------------------------------------------------------------------------------------------------------------------------------------------------------------------------------------------------------|----|----|
| 606 | Neu5Ac $\alpha$ 2-6Gal $\beta$ 1-4GlcNAc $\beta$ 1-3Gal $\beta$ 1-4GlcNAc $\beta$ 1-3Gal $\beta$ 1-4GlcNAc $\beta$ 1-2Man $\alpha$ 1-6(Neu5Ac $\alpha$ 2-6Gal $\beta$ 1-4GlcNAc $\beta$ 1-3Gal $\beta$ 1-4GlcNAc $\beta$ 1-3Gal $\beta$ 1-4GlcNAc $\beta$ 1-2Man $\alpha$ 1-3)Man $\beta$ 1-4GlcNAc $\beta$ 1-4GlcNAc $\beta$ -Sp12                                                                                                                                                                                                                                                                                        | 18 | 23 |
| 542 | Gal $\beta$ 1-4GlcNAc $\beta$ 1-3Gal $\beta$ 1-4GlcNAc $\beta$ 1-2Man $\alpha$ 1-6(Gal $\beta$ 1-4GlcNAc $\beta$ 1-3Gal $\beta$ 1-4GlcNAc $\beta$ 1-2Man $\alpha$ 1-3)Man $\beta$ 1-4GlcNAc $\beta$ 1-4GlcNAc $\beta$ -Sp24                                                                                                                                                                                                                                                                                                                                                                                                | 18 | 5  |
| 210 | Man $\alpha$ 1-6(Man $\alpha$ 1-2Man $\alpha$ 1-3)Man $\alpha$ 1-6(Man $\alpha$ 1-2Man $\alpha$ 1-3)Man $\beta$ 1-4GlcNAc $\beta$ 1-4GlcNAc $\beta$ -Sp12                                                                                                                                                                                                                                                                                                                                                                                                                                                                  | 18 | 24 |
| 377 | Neu5Ac $\alpha$ 2-6Gal $\beta$ 1-4GlcNAc $\beta$ 1-3GalNAc-Sp14                                                                                                                                                                                                                                                                                                                                                                                                                                                                                                                                                            | 18 | 7  |
| 588 | Gal $\beta$ 1-4GlcNAc $\beta$ 1-3Gal $\beta$ 1-4GlcNAc $\beta$ 1-3Gal $\beta$ 1-4GlcNAc $\beta$ 1-3Gal $\beta$ 1-4GlcNAc $\beta$ 1-3Gal $\beta$ 1-4GlcNAc $\beta$ 1-6(Gal $\beta$ 1-4GlcNAc $\beta$ 1-3Gal $\beta$ 1-4GlcNAc $\beta$ 1-3Gal $\beta$ 1-4GlcNAc $\beta$ 1-3Gal $\beta$ 1-4GlcNAc $\beta$ 1-3Gal $\beta$ 1-4GlcNAc $\beta$ 1-2)Man $\alpha$ 1-6(Gal $\beta$ 1-4GlcNAc $\beta$ 1-3Gal $\beta$ 1-4GlcNAc $\beta$ 1-3Gal $\beta$ 1-4GlcNAc $\beta$ 1-3Gal $\beta$ 1-4GlcNAc $\beta$ 1-3Gal $\beta$ 1-4GlcNAc $\beta$ 1-2Man $\alpha$ 1-3)Man $\beta$ 1-4GlcNAc $\beta$ 1-4(Fuc $\alpha$ 1-6)GlcNAc $\beta$ -Sp24 | 18 | 9  |
| 223 | Neu5Ac $\alpha$ 2-3Gal $\beta$ 1-3GalNAc $\alpha$ -Sp8                                                                                                                                                                                                                                                                                                                                                                                                                                                                                                                                                                     | 18 | 13 |
| 143 | Gal $\beta$ 1-3GalNAc $\beta$ 1-3Gal $\alpha$ 1-4Gal $\beta$ 1-4Glc $\beta$ -Sp0                                                                                                                                                                                                                                                                                                                                                                                                                                                                                                                                           | 18 | 18 |
| 376 | Neu5Ac $\alpha$ 2-3Gal $\beta$ 1-4GlcNAc $\beta$ 1-3GalNAc-Sp14                                                                                                                                                                                                                                                                                                                                                                                                                                                                                                                                                            | 18 | 7  |
| 318 | Neu5Ac $\alpha$ 2-6Gal $\beta$ 1-4GlcNAc $\beta$ 1-2Man $\alpha$ 1-6(Neu5Ac $\alpha$ 2-3Gal $\beta$ 1-4GlcNAc $\beta$ 1-2Man $\alpha$ 1-3)Man $\beta$ 1-4GlcNAc $\beta$ 1-4GlcNAc $\beta$ -Sp12                                                                                                                                                                                                                                                                                                                                                                                                                            | 18 | 11 |
| 384 | Gal $\beta$ 1-4GlcNAc $\beta$ 1-6(Fuc $\alpha$ 1-4(Fuc $\alpha$ 1-2Gal $\beta$ 1-3)GlcNAc $\beta$ 1-3)Gal $\beta$ 1-4Glc-Sp21                                                                                                                                                                                                                                                                                                                                                                                                                                                                                              | 18 | 12 |
| 16  | GlcNAc $\beta$ -Sp0                                                                                                                                                                                                                                                                                                                                                                                                                                                                                                                                                                                                        | 18 | 10 |
| 206 | KDN $\alpha$ 2-3Gal $\beta$ 1-4GlcNAc $\beta$ -Sp0                                                                                                                                                                                                                                                                                                                                                                                                                                                                                                                                                                         | 18 | 12 |
| 50  | Man $\alpha$ 1-6(Man $\alpha$ 1-3)Man $\beta$ 1-4GlcNAc $\beta$ 1-4GlcNAc $\beta$ -Sp12                                                                                                                                                                                                                                                                                                                                                                                                                                                                                                                                    | 18 | 7  |
| 213 | Man $\alpha$ 1-6(Man $\alpha$ 1-3)Man $\alpha$ -Sp9                                                                                                                                                                                                                                                                                                                                                                                                                                                                                                                                                                        | 17 | 9  |
| 581 | Gal $\beta$ 1-4GlcNAc $\beta$ 1-3Gal $\beta$ 1-4GlcNAc $\beta$ 1-2Man $\alpha$ 1-6(Gal $\beta$ 1-4GlcNAc $\beta$ 1-3Gal $\beta$ 1-4GlcNAc $\beta$ 1-3Gal $\beta$ 1-4GlcNAc $\beta$ 1-3Gal $\beta$ 1-4GlcNAc $\beta$ 1-3Gal $\beta$ 1-4GlcNAc $\beta$ 1-2Man $\alpha$ 1-3)Man $\beta$ 1-4GlcNAc $\beta$ 1-4(Fuc $\alpha$ 1-6)GlcNAc $\beta$ -Sp19                                                                                                                                       | 17 | 3  |
| 576 | GlcNAc $\beta$ 1-3Gal $\beta$ 1-4GlcNAc $\beta$ 1-3Gal $\beta$ 1-4GlcNAc $\beta$ 1-2Man $\alpha$ 1-6(GlcNAc $\beta$ 1-3Gal $\beta$ 1-4GlcNAc $\beta$ 1-3Gal $\beta$ 1-4GlcNAc $\beta$ 1-2Man $\alpha$ 1-3)Man $\beta$ 1-4GlcNAc $\beta$ 1-4(Fuc $\alpha$ 1-6)GlcNAc $\beta$ -Sp24                                                                                                                                                                                                                                                                                                                                          | 17 | 4  |
| 326 | Neu5Ac $\alpha$ 2-3Gal $\beta$ 1-4GlcNAc $\beta$ 1-2Man $\alpha$ 1-6(Neu5Ac $\alpha$ 2-6Gal $\beta$ 1-4GlcNAc $\beta$ 1-2Man $\alpha$ 1-3)Man $\beta$ 1-4GlcNAc $\beta$ 1-4GlcNAc $\beta$ -Sp12                                                                                                                                                                                                                                                                                                                                                                                                                            | 17 | 10 |
| 6   | Fuc $\alpha$ -Sp8                                                                                                                                                                                                                                                                                                                                                                                                                                                                                                                                                                                                          | 17 | 5  |
| 145 | Gal $\beta$ 1-3GalNAc $\beta$ 1-4Gal $\beta$ 1-4Glc $\beta$ -Sp8                                                                                                                                                                                                                                                                                                                                                                                                                                                                                                                                                           | 17 | 16 |
| 439 | Gal $\beta$ 1-4Gal $\beta$ -Sp10                                                                                                                                                                                                                                                                                                                                                                                                                                                                                                                                                                                           | 17 | 7  |
| 529 | Neu5Ac $\alpha$ 2-3Gal $\beta$ 1-3GlcNAc $\beta$ 1-4Gal $\beta$ 1-4Glc $\beta$ -Sp0                                                                                                                                                                                                                                                                                                                                                                                                                                                                                                                                        | 17 | 20 |
| 106 | Gal $\alpha$ 1-3(Fuc $\alpha$ 1-2)Gal $\beta$ 1-4Glc $\beta$ -Sp0                                                                                                                                                                                                                                                                                                                                                                                                                                                                                                                                                          | 17 | 11 |
| 589 | Gal $\beta$ 1-4GlcNAc $\beta$ 1-3Gal $\beta$ 1-4GlcNAc $\beta$ 1-3GalNAc $\alpha$ -Sp14                                                                                                                                                                                                                                                                                                                                                                                                                                                                                                                                    | 17 | 5  |
| 504 | (3S)GalNAc $\beta$ 1-4(Fuc $\alpha$ 1-3)GlcNAc $\beta$ -Sp8                                                                                                                                                                                                                                                                                                                                                                                                                                                                                                                                                                | 17 | 8  |

|     |                                                                                                                                                                                                                                                                                                                                                                 |    |    |
|-----|-----------------------------------------------------------------------------------------------------------------------------------------------------------------------------------------------------------------------------------------------------------------------------------------------------------------------------------------------------------------|----|----|
| 482 | Neu5Ac $\alpha$ 2-6Gal $\beta$ 1-4GlcNAc $\beta$ 1-2Man $\alpha$ 1-6(Neu5Ac $\alpha$ 2-6Gal $\beta$ 1-4GlcNAc $\beta$ 1-2Man $\alpha$ 1-3)Man $\beta$ 1-4GlcNAc $\beta$ 1-4(Fuca1-6)GlcNAc $\beta$ -Sp24                                                                                                                                                        | 17 | 9  |
| 11  | Neu5Ac $\beta$ -Sp8                                                                                                                                                                                                                                                                                                                                             | 17 | 6  |
| 231 | GalNAc $\beta$ 1-4(Neu5Ac $\alpha$ 2-3)Gal $\beta$ 1-4GlcNAc $\beta$ -Sp0                                                                                                                                                                                                                                                                                       | 16 | 16 |
| 462 | Neu5Ac $\alpha$ 2-3Gal $\beta$ 1-4GlcNAc $\beta$ 1-6(Neu5Ac $\alpha$ 2-3Gal $\beta$ 1-4GlcNAc $\beta$ 1-2)Man $\alpha$ 1-6(GlcNAc $\beta$ 1-4)(Neu5Ac $\alpha$ 2-3Gal $\beta$ 1-4GlcNAc $\beta$ 1-4(Neu5Ac $\alpha$ 2-3Gal $\beta$ 1-4GlcNAc $\beta$ 1-2)Man $\alpha$ 1-3)Man $\beta$ 1-4GlcNAc $\beta$ 1-4GlcNAc $\beta$ -Sp21                                 | 16 | 8  |
| 35  | (3S)Gal $\beta$ 1-4(6S)GlcNAc $\beta$ -Sp8                                                                                                                                                                                                                                                                                                                      | 16 | 3  |
| 58  | Fuca1-2Gal $\beta$ 1-3GalNAc $\beta$ 1-3Gal $\alpha$ -Sp9                                                                                                                                                                                                                                                                                                       | 16 | 13 |
| 550 | Gal $\beta$ 1-4GlcNAc $\beta$ 1-3Gal $\beta$ 1-4GlcNAc $\beta$ 1-3Gal $\beta$ 1-4GlcNAc $\beta$ 1-3Gal $\beta$ 1-4GlcNAc $\beta$ 1-2Man $\alpha$ 1-6(Gal $\beta$ 1-4GlcNAc $\beta$ 1-3Gal $\beta$ 1-4GlcNAc $\beta$ 1-3Gal $\beta$ 1-4GlcNAc $\beta$ 1-3Gal $\beta$ 1-4GlcNAc $\beta$ 1-2Man $\alpha$ 1-3)Man $\beta$ 1-4GlcNAc $\beta$ 1-4GlcNAc $\beta$ -Sp25 | 16 | 16 |
| 109 | Gal $\alpha$ 1-4(Gal $\alpha$ 1-3)Gal $\beta$ 1-4GlcNAc $\beta$ -Sp8                                                                                                                                                                                                                                                                                            | 16 | 12 |
| 498 | Gal $\alpha$ 1-3(Fuca1-2)Gal $\beta$ 1-4GlcNAc $\beta$ 1-6GalNAc $\alpha$ -Sp14                                                                                                                                                                                                                                                                                 | 16 | 14 |
| 227 | Neu5Ac $\alpha$ 2-8Neu5Ac $\alpha$ 2-8Neu5Ac $\alpha$ 2-3Gal $\beta$ 1-4Glc $\beta$ -Sp0                                                                                                                                                                                                                                                                        | 16 | 9  |
| 420 | Fuca1-2Gal $\beta$ 1-4GlcNAc $\beta$ 1-2Man $\alpha$ 1-6(Fuca1-2Gal $\beta$ 1-4GlcNAc $\beta$ 1-2Man $\alpha$ 1-3)Man $\beta$ 1-4GlcNAc $\beta$ 1-4(Fuca1-6)GlcNAc $\beta$ -Sp22                                                                                                                                                                                | 16 | 9  |
| 127 | Gal $\beta$ 1-3GlcNAc $\beta$ 1-3Gal $\beta$ 1-4(Fuca1-3)GlcNAc $\beta$ -Sp0                                                                                                                                                                                                                                                                                    | 16 | 9  |
| 209 | Man $\alpha$ 1-2Man $\alpha$ 1-3Man $\alpha$ -Sp9                                                                                                                                                                                                                                                                                                               | 16 | 15 |
| 59  | Fuca1-2Gal $\beta$ 1-3GalNAc $\beta$ 1-3Gal $\alpha$ 1-4Gal $\beta$ 1-4Glc $\beta$ -Sp9                                                                                                                                                                                                                                                                         | 16 | 9  |
| 92  | GalNAc $\alpha$ 1-3Gal $\beta$ -Sp8                                                                                                                                                                                                                                                                                                                             | 16 | 8  |
| 226 | GalNAc $\beta$ 1-4(Neu5Ac $\alpha$ 2-8Neu5Ac $\alpha$ 2-8Neu5Ac $\alpha$ 2-3)Gal $\beta$ 1-4Glc $\beta$ -Sp0                                                                                                                                                                                                                                                    | 16 | 12 |
| 489 | Gal $\alpha$ 1-3Gal $\beta$ 1-3GlcNAc $\beta$ 1-6GalNAc $\alpha$ -Sp14                                                                                                                                                                                                                                                                                          | 16 | 9  |
| 184 | GlcNAc $\beta$ 1-3Gal $\beta$ 1-4GlcNAc $\beta$ 1-3Gal $\beta$ 1-4GlcNAc $\beta$ -Sp0                                                                                                                                                                                                                                                                           | 16 | 5  |
| 347 | Neu5Ac $\alpha$ 2-6Gal $\beta$ 1-4GlcNAc $\beta$ 1-2Man $\alpha$ 1-6Man $\beta$ 1-4GlcNAc $\beta$ 1-4GlcNAc-Sp12                                                                                                                                                                                                                                                | 16 | 3  |
| 289 | Gal $\beta$ 1-3GlcNAc $\beta$ 1-3Gal $\beta$ 1-3GlcNAc $\beta$ -Sp0                                                                                                                                                                                                                                                                                             | 15 | 9  |
| 20  | Gal $\beta$ 1-4GlcNAc $\beta$ 1-6(Gal $\beta$ 1-4GlcNAc $\beta$ 1-3)GalNAc-Sp14                                                                                                                                                                                                                                                                                 | 15 | 7  |
| 495 | Gal $\alpha$ 1-3Gal $\beta$ 1-4GlcNAc $\beta$ 1-6GalNAc $\alpha$ -Sp14                                                                                                                                                                                                                                                                                          | 15 | 10 |
| 102 | Gal $\alpha$ 1-3(Fuca1-2)Gal $\beta$ 1-3GlcNAc $\beta$ -Sp8                                                                                                                                                                                                                                                                                                     | 15 | 11 |
| 424 | GalNAc $\alpha$ 1-3(Fuca1-2)Gal $\beta$ 1-3GlcNAc $\beta$ 1-3GalNAc-Sp14                                                                                                                                                                                                                                                                                        | 15 | 7  |
| 344 | GlcNAc $\alpha$ 1-4Gal $\beta$ 1-3GalNAc-Sp14                                                                                                                                                                                                                                                                                                                   | 15 | 14 |
| 562 | GalNAc $\beta$ 1-3GlcNAc $\beta$ -Sp0                                                                                                                                                                                                                                                                                                                           | 15 | 14 |
| 525 | Gal $\alpha$ 1-3(Fuca1-2)Gal $\beta$ 1-3GlcNAc $\beta$ 1-6GalNAc-Sp14                                                                                                                                                                                                                                                                                           | 15 | 6  |
| 88  | GlcNAc $\beta$ 1-3Gal $\beta$ 1-3GalNAc $\alpha$ -Sp8                                                                                                                                                                                                                                                                                                           | 15 | 2  |
| 510 | Gal $\beta$ 1-3(6S)GlcNAc $\beta$ -Sp8                                                                                                                                                                                                                                                                                                                          | 15 | 5  |
| 290 | Gal $\beta$ 1-4(Fuca1-3)(6S)GlcNAc $\beta$ -Sp0                                                                                                                                                                                                                                                                                                                 | 15 | 5  |
| 348 | Neu5Ac $\alpha$ 2-6Gal $\beta$ 1-4GlcNAc $\beta$ 1-2Man $\alpha$ 1-3Man $\beta$ 1-4GlcNAc $\beta$ 1-4GlcNAc-Sp12                                                                                                                                                                                                                                                | 14 | 10 |

|     |                                                                                                                                                                                                                                                                                                                                     |    |    |
|-----|-------------------------------------------------------------------------------------------------------------------------------------------------------------------------------------------------------------------------------------------------------------------------------------------------------------------------------------|----|----|
| 603 | Neu5Ac $\alpha$ 2-3Gal $\beta$ 1-4GlcNAc $\beta$ 1-3Gal $\beta$ 1-4GlcNAc $\beta$ 1-2Man $\alpha$ 1-6(Neu5Ac $\alpha$ 2-3Gal $\beta$ 1-4GlcNAc $\beta$ 1-3Gal $\beta$ 1-4GlcNAc $\beta$ 1-2Man $\alpha$ 1-3)Man $\beta$ 1-4GlcNAc $\beta$ 1-4GlcNAc $\beta$ -Sp12                                                                   | 14 | 13 |
| 238 | Neu5Ac $\alpha$ 2-3Gal $\beta$ 1-3(6S)GlcNAc-Sp8                                                                                                                                                                                                                                                                                    | 14 | 9  |
| 551 | Gal $\beta$ 1-3GlcNAc $\beta$ 1-3Gal $\beta$ 1-4GlcNAc $\beta$ 1-2Man $\alpha$ 1-6(Gal $\beta$ 1-3GlcNAc $\beta$ 1-3Gal $\beta$ 1-4GlcNAc $\beta$ 1-2Man $\alpha$ 1-3)Man $\beta$ 1-4GlcNAc $\beta$ 1-4GlcNAc-Sp25                                                                                                                  | 14 | 6  |
| 445 | Fuc $\alpha$ 1-2Gal $\beta$ 1-4 GlcNAc $\beta$ 1-2Man $\alpha$ 1-6(Fuc $\alpha$ 1-2Gal $\beta$ 1-4GlcNAc $\beta$ 1-2(Fuc $\alpha$ 1-2Gal $\beta$ 1-4GlcNAc $\beta$ 1-4)Man $\alpha$ 1-3)Man $\beta$ 1-4GlcNAc $\beta$ 1-4GlcNAc $\beta$ -Sp12                                                                                       | 14 | 6  |
| 314 | Man $\alpha$ 1-6(Man $\alpha$ 1-3)Man $\alpha$ 1-6(Man $\alpha$ 1-3)Man $\beta$ -Sp10                                                                                                                                                                                                                                               | 14 | 7  |
| 123 | Gal $\alpha$ 1-4GlcNAc $\beta$ -Sp8                                                                                                                                                                                                                                                                                                 | 14 | 11 |
| 317 | Neu5Ac $\alpha$ 2-3Gal $\beta$ 1-4GlcNAc $\beta$ 1-6(Neu5Ac $\alpha$ 2-3Gal $\beta$ 1-3)GalNAc $\alpha$ -Sp14                                                                                                                                                                                                                       | 14 | 9  |
| 36  | (3S)Gal $\beta$ 1-4GlcNAc $\beta$ -Sp0                                                                                                                                                                                                                                                                                              | 14 | 4  |
| 151 | Gal $\beta$ 1-4(Fuc $\alpha$ 1-3)GlcNAc $\beta$ -Sp0                                                                                                                                                                                                                                                                                | 14 | 6  |
| 602 | Neu5Ac $\alpha$ 2-6Gal $\beta$ 1-4GlcNAc $\beta$ 1-6(Gal $\beta$ 1-3)GalNAc $\alpha$ -Sp14                                                                                                                                                                                                                                          | 14 | 4  |
| 330 | Neu5Ac $\alpha$ 2-6Gal $\beta$ 1-4GlcNAc $\beta$ 1-3Gal $\beta$ 1-3GlcNAc $\beta$ -Sp0                                                                                                                                                                                                                                              | 14 | 3  |
| 528 | GalNAc $\beta$ 1-4GlcNAc $\beta$ 1-2Man $\alpha$ -Sp0                                                                                                                                                                                                                                                                               | 14 | 4  |
| 382 | Gal $\beta$ 1-3GlcNAc $\beta$ 1-3Gal $\beta$ 1-4GlcNAc $\beta$ 1-6(Gal $\beta$ 1-3GlcNAc $\beta$ 1-3)Gal $\beta$ 1-4Glc $\beta$ -Sp0                                                                                                                                                                                                | 14 | 4  |
| 124 | Gal $\alpha$ 1-6Glc $\beta$ -Sp8                                                                                                                                                                                                                                                                                                    | 13 | 4  |
| 477 | Neu5Ac $\alpha$ 2-6Gal $\beta$ 1-4GlcNAc $\beta$ 1-6(Gal $\beta$ 1-3GlcNAc $\beta$ 1-3)Gal $\beta$ 1-4Glc $\beta$ -Sp21                                                                                                                                                                                                             | 13 | 2  |
| 67  | Fuc $\alpha$ 1-2Gal $\beta$ 1-3GlcNAc $\beta$ -Sp0                                                                                                                                                                                                                                                                                  | 13 | 5  |
| 540 | GlcNAc $\beta$ 1-3Gal $\beta$ 1-4GlcNAc $\beta$ 1-2Man $\alpha$ 1-6(GlcNAc $\beta$ 1-3Gal $\beta$ 1-4GlcNAc $\beta$ 1-2Man $\alpha$ 1-3)Man $\beta$ 1-4GlcNAc $\beta$ 1-4GlcNAc $\beta$ -Sp25                                                                                                                                       | 13 | 6  |
| 283 | Neu5Gc $\alpha$ 2-3Gal $\beta$ 1-4GlcNAc $\beta$ -Sp0                                                                                                                                                                                                                                                                               | 13 | 4  |
| 3   | Man $\alpha$ -Sp8                                                                                                                                                                                                                                                                                                                   | 13 | 7  |
| 158 | Gal $\beta$ 1-4GalNAc $\beta$ 1-3(Fuc $\alpha$ 1-2)Gal $\beta$ 1-4GlcNAc $\beta$ -Sp8                                                                                                                                                                                                                                               | 13 | 9  |
| 221 | Fuc $\alpha$ 1-2Gal $\beta$ 1-4(6S)GlcNAc $\beta$ -Sp8                                                                                                                                                                                                                                                                              | 13 | 3  |
| 219 | (3S)Gal $\beta$ 1-4(Fuc $\alpha$ 1-3)(6S)GlcNAc $\beta$ -Sp8                                                                                                                                                                                                                                                                        | 13 | 9  |
| 496 | Gal $\beta$ 1-4(Fuc $\alpha$ 1-3)GlcNAc $\beta$ 1-2Man $\alpha$ -Sp0                                                                                                                                                                                                                                                                | 13 | 7  |
| 327 | Gal $\beta$ 1-4(Fuc $\alpha$ 1-3)GlcNAc $\beta$ 1-2Man $\alpha$ 1-6(Gal $\beta$ 1-4(Fuc $\alpha$ 1-3)GlcNAc $\beta$ 1-2Man $\alpha$ 1-3)Man $\beta$ 1-4GlcNAc $\beta$ 1-4GlcNAc $\beta$ -Sp20                                                                                                                                       | 13 | 4  |
| 79  | Fuc $\alpha$ 1-3GlcNAc $\beta$ -Sp8                                                                                                                                                                                                                                                                                                 | 13 | 9  |
| 48  | Neu5,9Ac $_2\alpha$ -Sp8                                                                                                                                                                                                                                                                                                            | 13 | 8  |
| 585 | GlcNAc $\beta$ 1-3Gal $\beta$ 1-4GlcNAc $\beta$ 1-3Gal $\beta$ 1-4GlcNAc $\beta$ 1-3Gal $\beta$ 1-4GlcNAc $\beta$ 1-6(GlcNAc $\beta$ 1-3Gal $\beta$ 1-4GlcNAc $\beta$ 1-3Gal $\beta$ 1-4GlcNAc $\beta$ 1-3Gal $\beta$ 1-4GlcNAc $\beta$ 1-2Man $\alpha$ 1-3)Man $\beta$ 1-4GlcNAc $\beta$ 1-4(Fuc $\alpha$ 1-6)GlcNAc $\beta$ -Sp24 | 13 | 2  |
| 2   | Glc $\alpha$ -Sp8                                                                                                                                                                                                                                                                                                                   | 13 | 16 |

|     |                                                                                                                                                                                                                         |    |    |
|-----|-------------------------------------------------------------------------------------------------------------------------------------------------------------------------------------------------------------------------|----|----|
| 565 | Galβ1-4GlcNAcβ1-3Galβ1-4GlcNAcβ1-3Galβ1-4GlcNAcβ1-3Galβ1-4GlcNAcβ1-3Galβ1-4GlcNAcβ1-2Manα1-6(Galβ1-4GlcNAcβ1-3Galβ1-4GlcNAcβ1-3Galβ1-4GlcNAcβ1-3Galβ1-4GlcNAcβ1-3Galβ1-4GlcNAcβ1-2Manα1-3)Manβ1-4GlcNAcβ1-4GlcNAcβ-Sp25 | 13 | 11 |
| 466 | Neu5Acα2-6Galβ1-4GlcNAcβ1-6(Neu5Acα2-6Galβ1-4GlcNAcβ1-2)Manα1-6(GlcNAcβ1-4)(Neu5Acα2-6Galβ1-4GlcNAcβ1-4(Neu5Acα2-6Galβ1-4GlcNAcβ1-4(Neu5Acα2-6Galβ1-4GlcNAcβ1-2)Manα1-3)Manβ1-4GlcNAcβ1-4GlcNAcβ-Sp21                   | 13 | 7  |
| 599 | Galβ1-4GlcNAcβ1-3Galβ1-3GalNAcα-Sp14                                                                                                                                                                                    | 13 | 12 |
| 214 | Manα1-2Manα1-2Manα1-6(Manα1-3)Manα-Sp9                                                                                                                                                                                  | 12 | 5  |
| 128 | Galβ1-3(Fucα1-4)GlcNAc-Sp0                                                                                                                                                                                              | 12 | 12 |
| 279 | Neu5Acβ2-6Galβ1-4GlcNAcβ-Sp8                                                                                                                                                                                            | 12 | 12 |
| 282 | Neu5Gcα2-3Galβ1-4(Fucα1-3)GlcNAcβ-Sp0                                                                                                                                                                                   | 12 | 12 |
| 134 | GlcNAcβ1-6(Galβ1-3)GalNAcα-Sp14                                                                                                                                                                                         | 12 | 8  |
| 133 | GlcNAcβ1-6(Galβ1-3)GalNAcα-Sp8                                                                                                                                                                                          | 12 | 4  |
| 43  | (6S)Galβ1-4Glcβ-Sp8                                                                                                                                                                                                     | 12 | 6  |
| 593 | GlcNAcβ1-3Galβ1-4GlcNAcβ1-3GalNAcα-Sp14                                                                                                                                                                                 | 12 | 7  |
| 609 | GlcNAcβ1-3Fucα-Sp21                                                                                                                                                                                                     | 12 | 5  |
| 514 | GalNAcβ1-4(6S)GlcNAc-Sp8                                                                                                                                                                                                | 12 | 7  |
| 140 | Galβ1-3GalNAcα-Sp14                                                                                                                                                                                                     | 12 | 12 |
| 536 | GalNAcα1-3(Fucα1-2)Galβ1-3GalNAcβ1-3Galα1-4Galβ1-4Glc-Sp21                                                                                                                                                              | 12 | 4  |
| 433 | GlcNAcβ1-6(GlcNAcβ1-2)Manα1-6(GlcNAcβ1-4)(GlcNAcβ1-2Manα1-3)Manβ1-4GlcNAcβ1-4GlcNAc-Sp21                                                                                                                                | 12 | 9  |
| 63  | Fucα1-2Galβ1-3GalNAcβ1-4(Neu5Acα2-3)Galβ1-4Glcβ-Sp0                                                                                                                                                                     | 12 | 7  |
| 22  | 6S(3S)Galβ1-4(6S)GlcNAcβ-Sp0                                                                                                                                                                                            | 12 | 3  |
| 548 | Galβ1-4GlcNAcβ1-3Galβ1-4GlcNAcβ1-3Galβ1-4GlcNAcβ1-2Manα1-6(Galβ1-4GlcNAcβ1-3Galβ1-4GlcNAcβ1-3Galβ1-4GlcNAcβ1-2Manα1-3)Manβ1-4GlcNAcβ1-4GlcNAcβ-Sp24                                                                     | 12 | 7  |
| 194 | GlcNAcβ1-6Galβ1-4GlcNAcβ-Sp8                                                                                                                                                                                            | 12 | 9  |
| 481 | Neu5Acα2-6Galβ1-4GlcNAcβ1-6(Neu5Acα2-6Galβ1-4GlcNAcβ1-3)GalNAcα-Sp14                                                                                                                                                    | 12 | 7  |
| 18  | GlcN(Gc)β-Sp8                                                                                                                                                                                                           | 12 | 11 |
| 33  | (3S)Galβ1-4(Fucα1-3)GlcNAc-Sp8                                                                                                                                                                                          | 12 | 6  |
| 23  | 6S(3S)Galβ1-4GlcNAcβ-Sp0                                                                                                                                                                                                | 12 | 7  |
| 183 | GlcNAcβ1-3Galβ1-4GlcNAcβ-Sp8                                                                                                                                                                                            | 12 | 5  |
| 277 | Galβ1-3(Fucα1-4)GlcNAcβ1-3Galβ1-3(Fucα1-4)GlcNAcβ-Sp0                                                                                                                                                                   | 12 | 11 |
| 167 | Galβ1-4GlcNAcβ1-6(Galβ1-3)GalNAc-Sp14                                                                                                                                                                                   | 12 | 5  |
| 483 | Neu5Acα2-3Galβ1-4GlcNAcβ1-2Manα1-6(Neu5Acα2-3Galβ1-4GlcNAcβ1-2Manα1-3)Manβ1-4GlcNAcβ1-4(Fucα1-6)GlcNAcβ-Sp24                                                                                                            | 12 | 6  |
| 311 | GlcNAcβ1-4GlcNAcβ-Sp12                                                                                                                                                                                                  | 12 | 9  |
| 258 | Neu5Acα2-3Galβ1-4GlcNAcβ1-3Galβ1-4GlcNAcβ1-3Galβ1-4GlcNAcβ-Sp0                                                                                                                                                          | 12 | 10 |

|     |                                                                                                                                                                                                                                                                           |    |    |
|-----|---------------------------------------------------------------------------------------------------------------------------------------------------------------------------------------------------------------------------------------------------------------------------|----|----|
| 38  | (3S)Gal $\beta$ -Sp8                                                                                                                                                                                                                                                      | 12 | 20 |
| 595 | GlcNAc $\beta$ 1-3Gal $\beta$ 1-4GlcNAc $\beta$ 1-6(GlcNAc $\beta$ 1-3Gal $\beta$ 1-4GlcNAc $\beta$ 1-3)GalNAc $\alpha$ -Sp14                                                                                                                                             | 12 | 5  |
| 172 | Gal $\beta$ 1-4Glc $\beta$ -Sp8                                                                                                                                                                                                                                           | 12 | 2  |
| 315 | Man $\alpha$ 1-2Man $\alpha$ 1-6(Man $\alpha$ 1-3)Man $\alpha$ 1-6(Man $\alpha$ 1-2Man $\alpha$ 1-2Man $\alpha$ 1-3)Man $\alpha$ -Sp9                                                                                                                                     | 11 | 4  |
| 185 | GlcNAc $\beta$ 1-3Gal $\beta$ 1-4Glc $\beta$ -Sp0                                                                                                                                                                                                                         | 11 | 11 |
| 297 | (6S)Gal $\beta$ 1-4(6S)GlcNAc $\beta$ -Sp0                                                                                                                                                                                                                                | 11 | 13 |
| 390 | Fuc $\alpha$ 1-2Gal $\beta$ 1-3GalNAc $\alpha$ 1-3(Fuc $\alpha$ 1-2)Gal $\beta$ 1-4GlcNAc $\beta$ -Sp0                                                                                                                                                                    | 11 | 8  |
| 566 | GlcNAc $\beta$ 1-3Gal $\beta$ 1-3GalNAc-Sp14                                                                                                                                                                                                                              | 11 | 7  |
| 26  | (3S)Gal $\beta$ 1-4(6S)Glc $\beta$ -Sp0                                                                                                                                                                                                                                   | 11 | 12 |
| 396 | Neu5Ac $\alpha$ 2-3Gal $\beta$ 1-3GlcNAc $\beta$ 1-2Man $\alpha$ 1-6(Neu5Ac $\alpha$ 2-3Gal $\beta$ 1-3GlcNAc $\beta$ 1-2Man $\alpha$ 1-3)Man $\beta$ 1-4GlcNAc $\beta$ 1-4GlcNAc-Sp19                                                                                    | 11 | 4  |
| 177 | GlcNAc $\beta$ 1-6(GlcNAc $\beta$ 1-3)GalNAc $\alpha$ -Sp14                                                                                                                                                                                                               | 11 | 5  |
| 491 | Neu5Ac $\alpha$ 2-3Gal $\beta$ 1-3GlcNAc $\beta$ 1-6GalNAc $\alpha$ -Sp14                                                                                                                                                                                                 | 11 | 11 |
| 71  | Fuc $\alpha$ 1-2Gal $\beta$ 1-4(Fuc $\alpha$ 1-3)GlcNAc $\beta$ -Sp0                                                                                                                                                                                                      | 11 | 4  |
| 66  | Fuc $\alpha$ 1-2Gal $\beta$ 1-3GlcNAc $\beta$ 1-3Gal $\beta$ 1-4Glc $\beta$ -Sp10                                                                                                                                                                                         | 11 | 13 |
| 516 | (4S)GalNAc $\beta$ -Sp10                                                                                                                                                                                                                                                  | 11 | 2  |
| 188 | GlcNAc $\beta$ 1-4Gal $\beta$ 1-4GlcNAc $\beta$ -Sp8                                                                                                                                                                                                                      | 11 | 5  |
| 91  | GalNAc $\alpha$ 1-3GalNAc $\beta$ -Sp8                                                                                                                                                                                                                                    | 11 | 4  |
| 141 | Gal $\beta$ 1-3GalNAc $\alpha$ -Sp16                                                                                                                                                                                                                                      | 11 | 6  |
| 429 | Gal $\beta$ 1-4GlcNAc $\beta$ 1-6(Fuc $\alpha$ 1-2Gal $\beta$ 1-3GlcNAc $\beta$ 1-3)Gal $\beta$ 1-4Glc-Sp21                                                                                                                                                               | 11 | 10 |
| 131 | Gal $\beta$ 1-4GlcNAc $\beta$ 1-6GalNAc $\alpha$ -Sp8                                                                                                                                                                                                                     | 11 | 6  |
| 329 | Neu5,9Ac2 $\alpha$ 2-3Gal $\beta$ 1-3GlcNAc $\beta$ -Sp0                                                                                                                                                                                                                  | 11 | 12 |
| 70  | Fuc $\alpha$ 1-2Gal $\beta$ 1-4(Fuc $\alpha$ 1-3)GlcNAc $\beta$ 1-3Gal $\beta$ 1-4(Fuc $\alpha$ 1-3)GlcNAc $\beta$ 1-3Gal $\beta$ 1-4(Fuc $\alpha$ 1-3)GlcNAc $\beta$ -Sp0                                                                                                | 11 | 5  |
| 116 | Gal $\alpha$ 1-3Gal $\beta$ 1-4Glc $\beta$ -Sp0                                                                                                                                                                                                                           | 11 | 5  |
| 597 | Neu5Ac $\alpha$ 2-6Gal $\beta$ 1-4GlcNAc $\beta$ 1-3Gal $\beta$ 1-4GlcNAc $\beta$ 1-3GalNAc $\alpha$ -Sp14                                                                                                                                                                | 10 | 6  |
| 386 | Gal $\beta$ 1-3GlcNAc $\beta$ 1-3Gal $\beta$ 1-4(Fuc $\alpha$ 1-3)GlcNAc $\beta$ 1-6(Gal $\beta$ 1-3GlcNAc $\beta$ 1-3)Gal $\beta$ 1-4Glc-Sp21                                                                                                                            | 10 | 12 |
| 309 | GlcNAc $\beta$ 1-3Man-Sp10                                                                                                                                                                                                                                                | 10 | 13 |
| 39  | (6S)(4S)Gal $\beta$ 1-4GlcNAc $\beta$ -Sp0                                                                                                                                                                                                                                | 10 | 10 |
| 368 | Gal $\beta$ 1-4(Fuc $\alpha$ 1-3)GlcNAc $\beta$ 1-6(Fuc $\alpha$ 1-2Gal $\beta$ 1-4GlcNAc $\beta$ 1-3)Gal $\beta$ 1-4Glc-Sp21                                                                                                                                             | 10 | 5  |
| 21  | GlcNAc $\beta$ 1-6(GlcNAc $\beta$ 1-4)(GlcNAc $\beta$ 1-3)GlcNAc-Sp8                                                                                                                                                                                                      | 10 | 12 |
| 300 | Gal $\beta$ 1-3Gal $\beta$ 1-4GlcNAc $\beta$ -Sp8                                                                                                                                                                                                                         | 10 | 8  |
| 460 | Neu5Ac $\alpha$ 2-3Gal $\beta$ 1-4GlcNAc $\beta$ 1-4Man $\alpha$ 1-6(GlcNAc $\beta$ 1-4)(Neu5Ac $\alpha$ 2-3Gal $\beta$ 1-4GlcNAc $\beta$ 1-4(Neu5Ac $\alpha$ 2-3Gal $\beta$ 1-4GlcNAc $\beta$ 1-2)Man $\alpha$ 1-3)Man $\beta$ 1-4GlcNAc $\beta$ 1-4GlcNAc $\beta$ -Sp21 | 10 | 7  |
| 236 | Neu5Ac $\alpha$ 2-3GalNAc $\alpha$ -Sp8                                                                                                                                                                                                                                   | 10 | 12 |
| 515 | (3S)GalNAc $\beta$ 1-4GlcNAc-Sp8                                                                                                                                                                                                                                          | 10 | 6  |



|     |                                                                                                                                                                                                                                     |    |    |
|-----|-------------------------------------------------------------------------------------------------------------------------------------------------------------------------------------------------------------------------------------|----|----|
| 212 | Man $\alpha$ 1-2Man $\alpha$ 1-6(Man $\alpha$ 1-2Man $\alpha$ 1-3)Man $\alpha$ 1-6(Man $\alpha$ 1-2Man $\alpha$ 1-2Man $\alpha$ 1-3)Man $\beta$ 1-4GlcNAc $\beta$ 1-4GlcNAc $\beta$ -Sp12                                           | 10 | 12 |
| 373 | GalNAc $\alpha$ 1-3(Fuc $\alpha$ 1-2)Gal $\beta$ 1-3GlcNAc $\beta$ 1-2Man $\alpha$ 1-6(GalNAc $\alpha$ 1-3(Fuc $\alpha$ 1-2)Gal $\beta$ 1-3GlcNAc $\beta$ 1-2Man $\alpha$ 1-3)Man $\beta$ 1-4GlcNAc $\beta$ 1-4GlcNAc $\beta$ -Sp20 | 10 | 9  |
| 45  | (6S)Gal $\beta$ 1-4(6S)Glc $\beta$ -Sp8                                                                                                                                                                                             | 10 | 6  |
| 87  | GalNAc $\alpha$ 1-3(Fuc $\alpha$ 1-2)Gal $\beta$ 1-4Glc $\beta$ -Sp0                                                                                                                                                                | 10 | 10 |
| 187 | GlcNAc $\beta$ 1-6(GlcNAc $\beta$ 1-4)GalNAc $\alpha$ -Sp8                                                                                                                                                                          | 10 | 5  |
| 19  | Gal $\beta$ 1-4GlcNAc $\beta$ 1-6(Gal $\beta$ 1-4GlcNAc $\beta$ 1-3)GalNAc $\alpha$ -Sp8                                                                                                                                            | 10 | 4  |
| 94  | GalNAc $\beta$ 1-3GalNAc $\alpha$ -Sp8                                                                                                                                                                                              | 10 | 2  |
| 488 | Gal $\beta$ 1-3GlcNAc $\beta$ 1-6GalNAc $\alpha$ -Sp14                                                                                                                                                                              | 10 | 8  |
| 432 | GlcNAc $\beta$ 1-2Man $\alpha$ 1-6(GlcNAc $\beta$ 1-4)(GlcNAc $\beta$ 1-4(GlcNAc $\beta$ 1-2)Man $\alpha$ 1-3)Man $\beta$ 1-4GlcNAc $\beta$ 1-4GlcNAc-Sp21                                                                          | 10 | 1  |
| 255 | Neu5Ac $\alpha$ 2-3Gal $\beta$ 1-4(Fuc $\alpha$ 1-3)GlcNAc $\beta$ -Sp8                                                                                                                                                             | 10 | 4  |
| 538 | Gal $\beta$ 1-3GalNAc $\beta$ 1-3Gal-Sp21                                                                                                                                                                                           | 10 | 6  |
| 135 | Neu5Ac $\alpha$ 2-6(Gal $\beta$ 1-3)GalNAc $\alpha$ -Sp8                                                                                                                                                                            | 10 | 6  |
| 323 | Neu5Gcb2-6Gal $\beta$ 1-4GlcNAc-Sp8                                                                                                                                                                                                 | 10 | 5  |
| 17  | GlcNAc $\beta$ -Sp8                                                                                                                                                                                                                 | 10 | 15 |
| 61  | Fuc $\alpha$ 1-2Gal $\beta$ 1-3GalNAc $\alpha$ -Sp8                                                                                                                                                                                 | 10 | 3  |
| 285 | Neu5Gc $\alpha$ 2-6GalNAc $\alpha$ -Sp0                                                                                                                                                                                             | 10 | 6  |
| 535 | GlcNAc $\beta$ 1-3Gal $\beta$ 1-4GlcNAc $\beta$ 1-6(GlcNAc $\beta$ 1-3)Gal $\beta$ 1-4GlcNAc-Sp0                                                                                                                                    | 9  | 6  |
| 278 | Neu5Ac $\beta$ 2-6GalNAc $\alpha$ -Sp8                                                                                                                                                                                              | 9  | 7  |
| 37  | (3S)Gal $\beta$ 1-4GlcNAc $\beta$ -Sp8                                                                                                                                                                                              | 9  | 10 |
| 406 | Gal $\beta$ 1-3GlcNAc $\beta$ 1-6Gal $\beta$ 1-4GlcNAc $\beta$ -Sp0                                                                                                                                                                 | 9  | 9  |
| 484 | Man $\alpha$ 1-6(Man $\alpha$ 1-3)Man $\beta$ 1-4GlcNAc $\beta$ 1-4(Fuc $\alpha$ 1-6)GlcNAc $\beta$ -Sp19                                                                                                                           | 9  | 5  |
| 89  | GalNAc $\alpha$ 1-3(Fuc $\alpha$ 1-2)Gal $\beta$ -Sp8                                                                                                                                                                               | 9  | 2  |
| 251 | Neu5Ac $\alpha$ 2-3Gal $\beta$ 1-4(6S)GlcNAc $\beta$ -Sp8                                                                                                                                                                           | 9  | 11 |
| 72  | Fuc $\alpha$ 1-2Gal $\beta$ 1-4(Fuc $\alpha$ 1-3)GlcNAc $\beta$ -Sp8                                                                                                                                                                | 9  | 8  |
| 218 | Neu5Ac $\alpha$ 2-3Gal $\beta$ 1-4GlcNAc $\beta$ 1-3Gal $\beta$ 1-4(Fuc $\alpha$ 1-3)GlcNAc $\beta$ -Sp0                                                                                                                            | 9  | 6  |
| 509 | Gal $\beta$ 1-3GlcNAc $\alpha$ 1-3Gal $\beta$ 1-4GlcNAc $\beta$ -Sp8                                                                                                                                                                | 9  | 7  |
| 25  | (3S)Gal $\beta$ 1-4Glc $\beta$ -Sp8                                                                                                                                                                                                 | 9  | 2  |
| 29  | (3S)Gal $\beta$ 1-3GalNAc $\alpha$ -Sp8                                                                                                                                                                                             | 9  | 8  |
| 247 | Neu5Ac $\alpha$ 2-3Gal $\beta$ 1-3GlcNAc $\beta$ 1-3Gal $\beta$ 1-4GlcNAc $\beta$ -Sp0                                                                                                                                              | 9  | 6  |
| 239 | Neu5Ac $\alpha$ 2-3Gal $\beta$ 1-3(Fuc $\alpha$ 1-4)GlcNAc $\beta$ -Sp8                                                                                                                                                             | 9  | 6  |
| 503 | GalNAc $\beta$ 1-4(Fuc $\alpha$ 1-3)(6S)GlcNAc $\beta$ -Sp8                                                                                                                                                                         | 9  | 6  |
| 150 | Gal $\beta$ 1-3GlcNAc $\beta$ -Sp8                                                                                                                                                                                                  | 9  | 5  |
| 511 | (6S)(4S)GalNAc $\beta$ 1-4GlcNAc-Sp8                                                                                                                                                                                                | 9  | 6  |

|     |                                                                                                                                                                                                                                                                           |   |    |
|-----|---------------------------------------------------------------------------------------------------------------------------------------------------------------------------------------------------------------------------------------------------------------------------|---|----|
| 539 | GlcNAc $\beta$ 1-3Gal $\beta$ 1-4GlcNAc $\beta$ 1-2Man $\alpha$ 1-6(GlcNAc $\beta$ 1-3Gal $\beta$ 1-4GlcNAc $\beta$ 1-2Man $\alpha$ 1-3)Man $\beta$ 1-4GlcNAc $\beta$ 1-4GlcNAc $\beta$ -Sp12                                                                             | 9 | 3  |
| 263 | Neu5Ac $\alpha$ 2-3Gal $\beta$ 1-4Glc $\beta$ -Sp0                                                                                                                                                                                                                        | 9 | 3  |
| 343 | GlcNAc $\alpha$ 1-4Gal $\beta$ 1-4GlcNAc $\beta$ 1-3Gal $\beta$ 1-4GlcNAc $\beta$ -Sp0                                                                                                                                                                                    | 9 | 13 |
| 201 | GlcA $\alpha$ -Sp8                                                                                                                                                                                                                                                        | 9 | 8  |
| 608 | Neu5Ac $\alpha$ 2-6Gal $\beta$ 1-4GlcNAc $\beta$ 1-3Gal $\beta$ 1-4GlcNAc $\beta$ 1-2Man $\alpha$ 1-6(Neu5Ac $\alpha$ 2-6Gal $\beta$ 1-4GlcNAc $\beta$ 1-3Gal $\beta$ 1-4GlcNAc $\beta$ 1-2Man $\alpha$ 1-3)Man $\beta$ 1-4GlcNAc $\beta$ 1-4GlcNAc $\beta$ -Sp12         | 9 | 6  |
| 465 | Neu5Ac $\alpha$ 2-6Gal $\beta$ 1-4GlcNAc $\beta$ 1-6(Neu5Ac $\alpha$ 2-6Gal $\beta$ 1-4GlcNAc $\beta$ 1-2)Man $\alpha$ 1-6(GlcNAc $\beta$ 1-4)(Neu5Ac $\alpha$ 2-6Gal $\beta$ 1-4GlcNAc $\beta$ 1-2Man $\alpha$ 1-3)Man $\beta$ 1-4GlcNAc $\beta$ 1-4GlcNAc $\beta$ -Sp21 | 9 | 2  |
| 27  | (3S)Gal $\beta$ 1-4(6S)Glc $\beta$ -Sp8                                                                                                                                                                                                                                   | 9 | 6  |
| 193 | GlcNAc $\beta$ 1-6GalNAc $\alpha$ -Sp14                                                                                                                                                                                                                                   | 9 | 5  |
| 47  | (6S)GlcNAc $\beta$ -Sp8                                                                                                                                                                                                                                                   | 9 | 15 |
| 316 | Man $\alpha$ 1-2Man $\alpha$ 1-6(Man $\alpha$ 1-2Man $\alpha$ 1-3)Man $\alpha$ 1-6(Man $\alpha$ 1-2Man $\alpha$ 1-2Man $\alpha$ 1-3)Man $\alpha$ -Sp9                                                                                                                     | 9 | 8  |
| 103 | Gal $\alpha$ 1-3(Fuc $\alpha$ 1-2)Gal $\beta$ 1-4(Fuc $\alpha$ 1-3)GlcNAc $\beta$ -Sp0                                                                                                                                                                                    | 9 | 8  |
| 57  | Neu5Ac $\alpha$ 2-6Gal $\beta$ 1-4GlcNAc $\beta$ 1-2Man $\alpha$ 1-6(Neu5Ac $\alpha$ 2-6Gal $\beta$ 1-4GlcNAc $\beta$ 1-2Man $\alpha$ 1-3)Man $\beta$ 1-4GlcNAc $\beta$ 1-4GlcNAc $\beta$ -Sp24                                                                           | 9 | 9  |
| 192 | GlcNAc $\beta$ 1-6GalNAc $\alpha$ -Sp8                                                                                                                                                                                                                                    | 9 | 6  |
| 5   | GalNAc $\alpha$ -Sp15                                                                                                                                                                                                                                                     | 9 | 5  |
| 333 | Gal $\alpha$ 1-4Gal $\beta$ 1-4GlcNAc $\beta$ 1-3Gal $\beta$ 1-4Glc $\beta$ -Sp0                                                                                                                                                                                          | 9 | 6  |
| 233 | GalNAc $\beta$ 1-4(Neu5Ac $\alpha$ 2-3)Gal $\beta$ 1-4Glc $\beta$ -Sp0                                                                                                                                                                                                    | 9 | 7  |
| 208 | Man $\alpha$ 1-2Man $\alpha$ 1-6(Man $\alpha$ 1-2Man $\alpha$ 1-3)Man $\alpha$ -Sp9                                                                                                                                                                                       | 9 | 13 |
| 378 | Neu5Ac $\alpha$ 2-3Gal $\beta$ 1-4(Fuc $\alpha$ 1-3)GlcNAc $\beta$ 1-3GalNAc $\alpha$ -Sp14                                                                                                                                                                               | 9 | 6  |
| 14  | Man $\beta$ -Sp8                                                                                                                                                                                                                                                          | 9 | 10 |
| 380 | Gal $\beta$ 1-3GalNAc $\alpha$ 1-3(Fuc $\alpha$ 1-2)Gal $\beta$ 1-4Glc-Sp0                                                                                                                                                                                                | 9 | 8  |
| 459 | Neu5Ac $\alpha$ 2-3Gal $\beta$ 1-4GlcNAc $\beta$ 1-2Man $\alpha$ 1-6(GlcNAc $\beta$ 1-4)(Neu5Ac $\alpha$ 2-3Gal $\beta$ 1-4GlcNAc $\beta$ 1-2Man $\alpha$ 1-3)Man $\beta$ 1-4GlcNAc $\beta$ 1-4GlcNAc $\beta$ -Sp21                                                       | 9 | 4  |
| 230 | Neu5Ac $\alpha$ 2-3(6S)Gal $\beta$ 1-4(Fuc $\alpha$ 1-3)GlcNAc $\beta$ -Sp8                                                                                                                                                                                               | 9 | 12 |
| 512 | (6S)GalNAc $\beta$ 1-4GlcNAc-Sp8                                                                                                                                                                                                                                          | 9 | 10 |
| 556 | Neu5Gc $\alpha$ 2-8Neu5Gc $\alpha$ 2-6Gal $\beta$ 1-4GlcNAc-Sp0                                                                                                                                                                                                           | 8 | 4  |
| 534 | Neu5Ac $\alpha$ 2-3Gal $\beta$ 1-4(Fuc $\alpha$ 1-3)GlcNAc $\beta$ 1-2Man $\alpha$ -Sp0                                                                                                                                                                                   | 8 | 5  |
| 331 | Neu5Ac $\alpha$ 2-3Gal $\beta$ 1-3(Fuc $\alpha$ 1-4)GlcNAc $\beta$ 1-3Gal $\beta$ 1-3(Fuc $\alpha$ 1-4)GlcNAc $\beta$ -Sp0                                                                                                                                                | 8 | 5  |
| 513 | (3S)GalNAc $\beta$ 1-4(3S)GlcNAc-Sp8                                                                                                                                                                                                                                      | 8 | 3  |
| 295 | Neu5Ac $\alpha$ 2-3Gal $\beta$ 1-4GlcNAc $\beta$ 1-3Gal $\beta$ 1-3GlcNAc $\beta$ -Sp0                                                                                                                                                                                    | 8 | 7  |
| 254 | Neu5Ac $\alpha$ 2-3Gal $\beta$ 1-4(Fuc $\alpha$ 1-3)GlcNAc $\beta$ -Sp0                                                                                                                                                                                                   | 8 | 6  |
| 592 | Neu5Ac $\alpha$ 2-3Gal $\beta$ 1-4GlcNAc $\beta$ 1-3Gal $\beta$ 1-4GlcNAc $\beta$ 1-3GalNAc $\alpha$ -Sp14                                                                                                                                                                | 8 | 10 |

|     |                                                                                                                                                                                                                     |   |    |
|-----|---------------------------------------------------------------------------------------------------------------------------------------------------------------------------------------------------------------------|---|----|
| 261 | Neu5Ac $\alpha$ 2-3Gal $\beta$ 1-4GlcNAc $\beta$ 1-3Gal $\beta$ 1-4GlcNAc $\beta$ -Sp0                                                                                                                              | 8 | 6  |
| 359 | KDN $\alpha$ 2-3Gal $\beta$ 1-3GalNAc $\alpha$ -Sp14                                                                                                                                                                | 8 | 4  |
| 246 | Neu5Ac $\alpha$ 2-3Gal $\beta$ 1-3GalNAc $\beta$ 1-3Gal $\alpha$ 1-4Gal $\beta$ 1-4Glc $\beta$ -Sp0                                                                                                                 | 8 | 4  |
| 149 | Gal $\beta$ 1-3GlcNAc $\beta$ -Sp0                                                                                                                                                                                  | 8 | 2  |
| 248 | Fuc $\alpha$ 1-2(6S)Gal $\beta$ 1-4Glc $\beta$ -Sp0                                                                                                                                                                 | 8 | 5  |
| 292 | Gal $\beta$ 1-4(Fuc $\alpha$ 1-3)GlcNAc $\beta$ 1-3Gal $\beta$ 1-3(Fuc $\alpha$ 1-4)GlcNAc $\beta$ -Sp0                                                                                                             | 8 | 8  |
| 31  | (3S)Gal $\beta$ 1-3GlcNAc $\beta$ -Sp8                                                                                                                                                                              | 8 | 6  |
| 216 | Man $\alpha$ 1-6(Man $\alpha$ 1-3)Man $\alpha$ 1-6(Man $\alpha$ 1-3)Man $\beta$ 1-4GlcNAc $\beta$ 1-4GlcNAc $\beta$ -Sp12                                                                                           | 8 | 2  |
| 1   | Gal $\alpha$ -Sp8                                                                                                                                                                                                   | 8 | 8  |
| 32  | (3S)Gal $\beta$ 1-4(Fuc $\alpha$ 1-3)GlcNAc-Sp0                                                                                                                                                                     | 8 | 8  |
| 176 | GlcNAc $\beta$ 1-6(GlcNAc $\beta$ 1-3)GalNAc $\alpha$ -Sp8                                                                                                                                                          | 8 | 5  |
| 179 | GlcNAc $\beta$ 1-3GalNAc $\alpha$ -Sp8                                                                                                                                                                              | 8 | 4  |
| 159 | Gal $\beta$ 1-4GlcNAc $\beta$ 1-3GalNAc $\alpha$ -Sp8                                                                                                                                                               | 8 | 6  |
| 165 | Gal $\beta$ 1-4GlcNAc $\beta$ 1-3Gal $\beta$ 1-4Glc $\beta$ -Sp8                                                                                                                                                    | 8 | 12 |
| 8   | Rha $\alpha$ -Sp8                                                                                                                                                                                                   | 8 | 4  |
| 338 | GlcNAc $\alpha$ 1-4Gal $\beta$ 1-4GlcNAc $\beta$ 1-3Gal $\beta$ 1-4GlcNAc $\beta$ 1-3Gal $\beta$ 1-4GlcNAc $\beta$ -Sp0                                                                                             | 8 | 10 |
| 100 | Gal $\alpha$ 1-2Gal $\beta$ -Sp8                                                                                                                                                                                    | 8 | 5  |
| 117 | Gal $\alpha$ 1-3Gal $\beta$ 1-4Glc-Sp10                                                                                                                                                                             | 8 | 5  |
| 303 | GlcNAc $\beta$ 1-6(Gal $\beta$ 1-4GlcNAc $\beta$ 1-3)Gal $\beta$ 1-4GlcNAc-Sp0                                                                                                                                      | 8 | 5  |
| 148 | Gal $\beta$ 1-3GlcNAc $\beta$ 1-3Gal $\beta$ 1-4Glc $\beta$ -Sp10                                                                                                                                                   | 8 | 8  |
| 405 | Gal $\alpha$ 1-3Gal $\beta$ 1-4GlcNAc $\beta$ 1-3GalNAc $\alpha$ -Sp14                                                                                                                                              | 8 | 6  |
| 191 | GlcNAc $\beta$ 1-4GlcNAc $\beta$ 1-4GlcNAc $\beta$ -Sp8                                                                                                                                                             | 8 | 7  |
| 275 | Neu5Ac $\alpha$ 2-8Neu5Ac $\alpha$ -Sp8                                                                                                                                                                             | 8 | 8  |
| 60  | Fuc $\alpha$ 1-2Gal $\beta$ 1-3(Fuc $\alpha$ 1-4)GlcNAc $\beta$ -Sp8                                                                                                                                                | 8 | 10 |
| 250 | Neu5Ac $\alpha$ 2-3Gal $\beta$ 1-3GlcNAc $\beta$ -Sp8                                                                                                                                                               | 7 | 3  |
| 110 | Gal $\alpha$ 1-3GalNAc $\alpha$ -Sp8                                                                                                                                                                                | 7 | 6  |
| 463 | Neu5Ac $\alpha$ 2-6Gal $\beta$ 1-4GlcNAc $\beta$ 1-2Man $\alpha$ 1-6(GlcNAc $\beta$ 1-4)(Neu5Ac $\alpha$ 2-6Gal $\beta$ 1-4GlcNAc $\beta$ 1-2Man $\alpha$ 1-3)Man $\beta$ 1-4GlcNAc $\beta$ 1-4GlcNAc $\beta$ -Sp21 | 7 | 5  |
| 310 | GlcNAc $\beta$ 1-4GlcNAc $\beta$ -Sp10                                                                                                                                                                              | 7 | 4  |
| 180 | GlcNAc $\beta$ 1-3GalNAc $\alpha$ -Sp14                                                                                                                                                                             | 7 | 5  |
| 113 | Gal $\alpha$ 1-3Gal $\beta$ 1-4(Fuc $\alpha$ 1-3)GlcNAc $\beta$ -Sp8                                                                                                                                                | 7 | 7  |
| 232 | GalNAc $\beta$ 1-4(Neu5Ac $\alpha$ 2-3)Gal $\beta$ 1-4GlcNAc $\beta$ -Sp8                                                                                                                                           | 7 | 4  |
| 120 | Gal $\alpha$ 1-4Gal $\beta$ 1-4GlcNAc $\beta$ -Sp0                                                                                                                                                                  | 7 | 6  |
| 228 | GalNAc $\beta$ 1-4(Neu5Ac $\alpha$ 2-8Neu5Ac $\alpha$ 2-3)Gal $\beta$ 1-4Glc $\beta$ -Sp0                                                                                                                           | 7 | 4  |
| 505 | Fuc $\alpha$ 1-2Gal $\beta$ 1-3GlcNAc $\beta$ 1-6(Fuc $\alpha$ 1-2Gal $\beta$ 1-3GlcNAc $\beta$ 1-3)GalNAc $\alpha$ -Sp14                                                                                           | 7 | 3  |

|     |                                                                                                                                                                               |   |    |
|-----|-------------------------------------------------------------------------------------------------------------------------------------------------------------------------------|---|----|
| 46  | Neu5Ac $\alpha$ 2-3(6S)Gal $\beta$ 1-4GlcNAc $\beta$ -Sp8                                                                                                                     | 7 | 7  |
| 487 | Neu5Ac $\alpha$ 2-6Gal $\beta$ 1-4GlcNAc $\beta$ 1-6(Fuc $\alpha$ 1-2Gal $\beta$ 1-4(Fuc $\alpha$ 1-3)GlcNAc $\beta$ 1-3)Gal $\beta$ 1-4Glc-Sp21                              | 7 | 5  |
| 237 | Neu5Ac $\alpha$ 2-3GalNAc $\beta$ 1-4GlcNAc $\beta$ -Sp0                                                                                                                      | 7 | 3  |
| 147 | Gal $\beta$ 1-3GlcNAc $\beta$ 1-3Gal $\beta$ 1-4GlcNAc $\beta$ -Sp0                                                                                                           | 7 | 5  |
| 594 | GlcNAc $\beta$ 1-3Gal $\beta$ 1-4GlcNAc $\beta$ 1-6(Gal $\beta$ 1-3)GalNAc $\alpha$ -Sp14                                                                                     | 7 | 13 |
| 144 | Gal $\beta$ 1-3GalNAc $\beta$ 1-4(Neu5Ac $\alpha$ 2-3)Gal $\beta$ 1-4Glc $\beta$ -Sp0                                                                                         | 7 | 5  |
| 253 | Neu5Ac $\alpha$ 2-3Gal $\beta$ 1-4(Fuc $\alpha$ 1-3)GlcNAc $\beta$ 1-3Gal $\beta$ 1-4(Fuc $\alpha$ 1-3)GlcNAc $\beta$ 1-3Gal $\beta$ 1-4(Fuc $\alpha$ 1-3)GlcNAc $\beta$ -Sp0 | 7 | 11 |
| 408 | GalNAc $\beta$ 1-3Gal $\alpha$ 1-6Gal $\beta$ 1-4Glc $\beta$ -Sp8                                                                                                             | 7 | 4  |
| 80  | Fuc $\alpha$ 1-4GlcNAc $\beta$ -Sp8                                                                                                                                           | 7 | 7  |
| 199 | Glc $\beta$ 1-6Glc $\beta$ -Sp8                                                                                                                                               | 7 | 12 |
| 157 | Gal $\beta$ 1-4GalNAc $\alpha$ 1-3(Fuc $\alpha$ 1-2)Gal $\beta$ 1-4GlcNAc $\beta$ -Sp8                                                                                        | 7 | 5  |
| 561 | GlcNAc $\beta$ 1-3Gal $\beta$ 1-4GlcNAc $\beta$ 1-6(GlcNAc $\beta$ 1-3Gal $\beta$ 1-3)GalNAc $\alpha$ -Sp14                                                                   | 7 | 4  |
| 321 | Neu5Ac $\alpha$ 2-8Neu5Ac $\beta$ -Sp17                                                                                                                                       | 7 | 3  |
| 304 | Gal $\beta$ 1-4GlcNAc $\alpha$ 1-6Gal $\beta$ 1-4GlcNAc $\beta$ -Sp0                                                                                                          | 7 | 10 |
| 111 | Gal $\alpha$ 1-3GalNAc $\alpha$ -Sp16                                                                                                                                         | 7 | 7  |
| 74  | Fuc $\alpha$ 1-2Gal $\beta$ 1-4GlcNAc $\beta$ 1-3Gal $\beta$ 1-4GlcNAc $\beta$ 1-3Gal $\beta$ 1-4GlcNAc $\beta$ -Sp0                                                          | 7 | 4  |
| 287 | Neu5Gc $\alpha$ -Sp8                                                                                                                                                          | 7 | 5  |
| 222 | Fuc $\alpha$ 1-2(6S)Gal $\beta$ 1-4(6S)Glc $\beta$ -Sp0                                                                                                                       | 7 | 5  |
| 220 | Fuc $\alpha$ 1-2(6S)Gal $\beta$ 1-4GlcNAc $\beta$ -Sp0                                                                                                                        | 7 | 6  |
| 322 | Neu5Ac $\alpha$ 2-8Neu5Ac $\alpha$ 2-8Neu5Ac $\beta$ -Sp8                                                                                                                     | 7 | 6  |
| 262 | Fuc $\alpha$ 1-2Gal $\beta$ 1-4(6S)Glc $\beta$ -Sp0                                                                                                                           | 7 | 2  |
| 93  | GalNAc $\alpha$ 1-4(Fuc $\alpha$ 1-2)Gal $\beta$ 1-4GlcNAc $\beta$ -Sp8                                                                                                       | 7 | 2  |
| 573 | Neu5Ac $\alpha$ 2-8Neu5Ac $\alpha$ 2-3Gal $\beta$ 1-3GalNAc $\beta$ 1-4(Neu5Ac $\alpha$ 2-3)Gal $\beta$ 1-4Glc-Sp21                                                           | 7 | 6  |
| 174 | GlcNAc $\alpha$ 1-6Gal $\beta$ 1-4GlcNAc $\beta$ -Sp8                                                                                                                         | 7 | 10 |
| 40  | (4S)Gal $\beta$ 1-4GlcNAc $\beta$ -Sp8                                                                                                                                        | 7 | 8  |
| 385 | Gal $\beta$ 1-4(Fuc $\alpha$ 1-3)GlcNAc $\beta$ 1-6(Fuc $\alpha$ 1-4(Fuc $\alpha$ 1-2Gal $\beta$ 1-3)GlcNAc $\beta$ 1-3)Gal $\beta$ 1-4Glc-Sp21                               | 7 | 8  |
| 367 | Neu5Ac $\alpha$ 2-6GlcNAc $\beta$ 1-4GlcNAc $\beta$ 1-4GlcNAc-Sp21                                                                                                            | 7 | 7  |
| 519 | GalNAc $\alpha$ 1-3(Fuc $\alpha$ 1-2)Gal $\beta$ 1-4GlcNAc $\beta$ 1-6GalNAc-Sp14                                                                                             | 7 | 5  |
| 97  | GalNAc $\beta$ 1-4(Fuc $\alpha$ 1-3)GlcNAc $\beta$ -Sp0                                                                                                                       | 6 | 6  |
| 15  | GalNAc $\beta$ -Sp8                                                                                                                                                           | 6 | 12 |
| 265 | Neu5Ac $\alpha$ 2-6GalNAc $\alpha$ -Sp8                                                                                                                                       | 6 | 8  |
| 137 | Neu5Ac $\beta$ 2-6(Gal $\beta$ 1-3)GalNAc $\alpha$ -Sp8                                                                                                                       | 6 | 8  |
| 155 | Gal $\beta$ 1-4(6S)Glc $\beta$ -Sp0                                                                                                                                           | 6 | 6  |
| 334 | GalNAc $\beta$ 1-3Gal $\alpha$ 1-4Gal $\beta$ 1-4GlcNAc $\beta$ 1-3Gal $\beta$ 1-4Glc $\beta$ -Sp0                                                                            | 6 | 11 |
| 99  | GalNAc $\beta$ 1-4GlcNAc $\beta$ -Sp8                                                                                                                                         | 6 | 3  |

|     |                                                                                                        |   |    |
|-----|--------------------------------------------------------------------------------------------------------|---|----|
| 293 | Galβ1-4GlcNAcβ1-3Galβ1-3GlcNAcβ-Sp0                                                                    | 6 | 2  |
| 30  | (3S)Galβ1-3GlcNAcβ-Sp0                                                                                 | 6 | 7  |
| 156 | Galβ1-4(6S)Glcβ-Sp8                                                                                    | 6 | 4  |
| 340 | GlcNAcα1-4Galβ1-3GlcNAcβ-Sp0                                                                           | 6 | 11 |
| 596 | Neu5Acα2-3Galβ1-4GlcNAcβ1-3Galβ1-4GlcNAcβ1-6(Neu5Acα2-3Galβ1-4GlcNAcβ1-3Galβ1-4GlcNAcβ1-3)GalNAcα-Sp14 | 6 | 6  |
| 610 | Galβ1-3GalNAcβ1-4(Neu5Acα2-8Neu5Acα2-8Neu5Acα2-3)Galβ1-4Glcβ-Sp21                                      | 6 | 5  |
| 444 | (6S)Galβ1-3(6S)GlcNAc-Sp0                                                                              | 6 | 2  |
| 197 | Glcα1-6Glcα1-6Glcβ-Sp8                                                                                 | 6 | 3  |
| 235 | Neu5Acα2-6(Neu5Acα2-3)GalNAcα-Sp8                                                                      | 6 | 4  |
| 306 | GalNAcβ1-3Galβ-Sp8                                                                                     | 6 | 2  |
| 409 | Galα1-3(Fucα1-2)Galβ1-4(Fucα1-3)Glcβ-Sp21                                                              | 6 | 3  |
| 242 | Neu5Acα2-3Galβ1-3(6S)GalNAcα-Sp8                                                                       | 6 | 6  |
| 471 | Neu5Acα2-3Galβ1-4GlcNAcβ1-6(Neu5Acα2-3Galβ1-4GlcNAcβ1-3)GalNAcα-Sp14                                   | 6 | 3  |
| 160 | Galβ1-4GlcNAcβ1-3GalNAc-Sp14                                                                           | 6 | 4  |
| 69  | Fucα1-2Galβ1-4(Fucα1-3)GlcNAcβ1-3Galβ1-4(Fucα1-3)GlcNAcβ-Sp0                                           | 6 | 2  |
| 163 | Galβ1-4GlcNAcβ1-3Galβ1-4GlcNAcβ-Sp0                                                                    | 6 | 2  |
| 383 | Galβ1-4(Fucα1-3)GlcNAcβ1-6(Galβ1-3GlcNAcβ1-3)Galβ1-4Glc-Sp21                                           | 6 | 6  |
| 49  | Neu5,9Ac2α2-6Galβ1-4GlcNAcβ-Sp8                                                                        | 6 | 3  |
| 225 | GalNAcβ1-4(Neu5Acα2-8Neu5Acα2-8Neu5Acα2-8Neu5Acα2-3)Galβ1-4Glcβ-Sp0                                    | 6 | 4  |
| 259 | Neu5Acα2-3Galβ1-4GlcNAcβ-Sp0                                                                           | 6 | 6  |
| 154 | Galβ1-4(Fucα1-3)GlcNAcβ1-3Galβ1-4(Fucα1-3)GlcNAcβ1-3Galβ1-4(Fucα1-3)GlcNAcβ-Sp0                        | 6 | 3  |
| 77  | Fucα1-2Galβ1-4Glcβ-Sp0                                                                                 | 6 | 5  |
| 75  | Fucα1-2Galβ1-4GlcNAcβ-Sp0                                                                              | 6 | 4  |
| 198 | Glcβ1-4Glcβ-Sp8                                                                                        | 5 | 4  |
| 276 | Neu5Acα2-8Neu5Acα2-3Galβ1-4Glcβ-Sp0                                                                    | 5 | 3  |
| 142 | Galβ1-3GalNAcβ-Sp8                                                                                     | 5 | 3  |
| 28  | (3S)Galβ1-3(Fucα1-4)GlcNAcβ-Sp8                                                                        | 5 | 3  |
| 337 | Neu5Acα2-3Galβ1-4(Fucα1-3)GlcNAcβ1-6(Neu5Acα2-3Galβ1-3)GalNAc-Sp14                                     | 5 | 3  |
| 181 | GlcNAcβ1-3Galβ-Sp8                                                                                     | 5 | 19 |
| 243 | Neu5Acα2-6(Neu5Acα2-3Galβ1-3)GalNAcα-Sp8                                                               | 5 | 9  |
| 119 | Galα1-4(Fucα1-2)Galβ1-4GlcNAcβ-Sp8                                                                     | 5 | 5  |
| 410 | Galβ1-4GlcNAcβ1-6(Neu5Acα2-6Galβ1-3GlcNAcβ1-3)Galβ1-4Glc-Sp21                                          | 5 | 2  |
| 189 | GlcNAcβ1-4GlcNAcβ1-4GlcNAcβ1-4GlcNAcβ1-4GlcNAcβ1-4GlcNAcβ1-Sp8                                         | 5 | 4  |
| 62  | Fucα1-2Galβ1-3GalNAcα-Sp14                                                                             | 5 | 4  |

|     |                                                                                                                                                                                                                                                                           |   |    |
|-----|---------------------------------------------------------------------------------------------------------------------------------------------------------------------------------------------------------------------------------------------------------------------------|---|----|
| 341 | GlcNAc $\alpha$ 1-4Gal $\beta$ 1-4GlcNAc $\beta$ 1-3Gal $\beta$ 1-4Glc $\beta$ -Sp0                                                                                                                                                                                       | 5 | 12 |
| 252 | Neu5Ac $\alpha$ 2-3Gal $\beta$ 1-4(Fuc $\alpha$ 1-3)(6S)GlcNAc $\beta$ -Sp8                                                                                                                                                                                               | 5 | 7  |
| 182 | GlcNAc $\beta$ 1-3Gal $\beta$ 1-4GlcNAc $\beta$ -Sp0                                                                                                                                                                                                                      | 5 | 6  |
| 260 | Neu5Ac $\alpha$ 2-3Gal $\beta$ 1-4GlcNAc $\beta$ -Sp8                                                                                                                                                                                                                     | 5 | 2  |
| 461 | Neu5Ac $\alpha$ 2-3Gal $\beta$ 1-4GlcNAc $\beta$ 1-6(Neu5Ac $\alpha$ 2-3Gal $\beta$ 1-4GlcNAc $\beta$ 1-2)Man $\alpha$ 1-6(GlcNAc $\beta$ 1-4)(Neu5Ac $\alpha$ 2-3Gal $\beta$ 1-4GlcNAc $\beta$ 1-2Man $\alpha$ 1-3)Man $\beta$ 1-4GlcNAc $\beta$ 1-4GlcNAc $\beta$ -Sp21 | 5 | 8  |
| 486 | Neu5Ac $\alpha$ 2-3Gal $\beta$ 1-3GlcNAc $\beta$ 1-2Man $\alpha$ 1-6(GlcNAc $\beta$ 1-4)(Neu5Ac $\alpha$ 2-3Gal $\beta$ 1-3GlcNAc $\beta$ 1-2Man $\alpha$ 1-3)Man $\beta$ 1-4GlcNAc $\beta$ 1-4GlcNAc-Sp21                                                                | 5 | 4  |
| 268 | Neu5Ac $\alpha$ 2-6Gal $\beta$ 1-4GlcNAc $\beta$ -Sp0                                                                                                                                                                                                                     | 5 | 5  |
| 563 | GalNAc $\beta$ 1-4GlcNAc $\beta$ 1-3GalNAc $\beta$ 1-4GlcNAc $\beta$ -Sp0                                                                                                                                                                                                 | 5 | 5  |
| 553 | Neu5Ac $\alpha$ 2-8Neu5Gc $\alpha$ 2-3Gal $\beta$ 1-4GlcNAc-Sp0                                                                                                                                                                                                           | 5 | 7  |
| 85  | GalNAc $\alpha$ 1-3(Fuc $\alpha$ 1-2)Gal $\beta$ 1-4GlcNAc $\beta$ -Sp0                                                                                                                                                                                                   | 5 | 3  |
| 105 | Gal $\alpha$ 1-3(Fuc $\alpha$ 1-2)Gal $\beta$ 1-4GlcNAc-Sp0                                                                                                                                                                                                               | 5 | 8  |
| 178 | GlcNAc $\beta$ 1-6(GlcNAc $\beta$ 1-3)Gal $\beta$ 1-4GlcNAc $\beta$ -Sp8                                                                                                                                                                                                  | 5 | 5  |
| 76  | Fuc $\alpha$ 1-2Gal $\beta$ 1-4GlcNAc $\beta$ -Sp8                                                                                                                                                                                                                        | 5 | 3  |
| 357 | KDN $\alpha$ 2-6Gal $\beta$ 1-4GlcNAc-Sp0                                                                                                                                                                                                                                 | 4 | 9  |
| 267 | Neu5Ac $\alpha$ 2-6Gal $\beta$ 1-4(6S)GlcNAc $\beta$ -Sp8                                                                                                                                                                                                                 | 4 | 6  |
| 499 | Fuc $\alpha$ 1-2Gal $\beta$ 1-4GlcNAc $\beta$ 1-2Man $\alpha$ -Sp0                                                                                                                                                                                                        | 4 | 5  |
| 162 | Gal $\beta$ 1-4GlcNAc $\beta$ 1-3Gal $\beta$ 1-4GlcNAc $\beta$ 1-3Gal $\beta$ 1-4GlcNAc $\beta$ -Sp0                                                                                                                                                                      | 4 | 4  |
| 479 | Neu5Ac $\alpha$ 2-3Gal $\beta$ 1-4GlcNAc $\beta$ 1-6GalNAc $\alpha$ -Sp14                                                                                                                                                                                                 | 4 | 7  |
| 98  | GalNAc $\beta$ 1-4GlcNAc $\beta$ -Sp0                                                                                                                                                                                                                                     | 4 | 4  |
| 555 | Neu5Gc $\alpha$ 2-8Neu5Gc $\alpha$ 2-3Gal $\beta$ 1-4GlcNAc $\beta$ 1-3Gal $\beta$ 1-4GlcNAc-Sp0                                                                                                                                                                          | 4 | 2  |
| 107 | Gal $\alpha$ 1-3(Fuc $\alpha$ 1-2)Gal $\beta$ -Sp8                                                                                                                                                                                                                        | 4 | 5  |
| 273 | Neu5Ac $\alpha$ 2-6Gal $\beta$ 1-4Glc $\beta$ -Sp8                                                                                                                                                                                                                        | 4 | 3  |
| 502 | Neu5Ac $\alpha$ 2-6GalNAc $\beta$ 1-4(6S)GlcNAc $\beta$ -Sp8                                                                                                                                                                                                              | 4 | 4  |
| 320 | GlcNAc $\beta$ 1-2Man $\alpha$ 1-6(Neu5Ac $\alpha$ 2-6Gal $\beta$ 1-4GlcNAc $\beta$ 1-2Man $\alpha$ 1-3)Man $\beta$ 1-4GlcNAc $\beta$ 1-4GlcNAc $\beta$ -Sp12                                                                                                             | 4 | 1  |
| 13  | Glc $\beta$ -Sp8                                                                                                                                                                                                                                                          | 4 | 10 |
| 146 | Gal $\beta$ 1-3Gal $\beta$ -Sp8                                                                                                                                                                                                                                           | 3 | 2  |
| 302 | Gal $\beta$ 1-4GlcNAc $\beta$ 1-6(Gal $\beta$ 1-4GlcNAc $\beta$ 1-3)Gal $\beta$ 1-4GlcNAc-Sp0                                                                                                                                                                             | 3 | 1  |
| 168 | Gal $\beta$ 1-4GlcNAc $\beta$ -Sp0                                                                                                                                                                                                                                        | 3 | 5  |
| 521 | Gal $\alpha$ 1-3Gal $\beta$ 1-4GlcNAc $\beta$ 1-2Man $\alpha$ -Sp0                                                                                                                                                                                                        | 3 | 5  |
| 381 | Gal $\beta$ 1-3GalNAc $\alpha$ 1-3(Fuc $\alpha$ 1-2)Gal $\beta$ 1-4GlcNAc-Sp0                                                                                                                                                                                             | 3 | 8  |
| 34  | (3S)Gal $\beta$ 1-4(6S)GlcNAc $\beta$ -Sp0                                                                                                                                                                                                                                | 3 | 6  |
| 78  | Fuc $\alpha$ 1-2Gal $\beta$ -Sp8                                                                                                                                                                                                                                          | 3 | 4  |
| 332 | Neu5Ac $\alpha$ 2-6Gal $\beta$ 1-4GlcNAc $\beta$ 1-3Gal $\beta$ 1-4GlcNAc $\beta$ 1-3Gal $\beta$ 1-4GlcNAc $\beta$ -Sp0                                                                                                                                                   | 3 | 2  |

|     |                                                                                                      |   |   |
|-----|------------------------------------------------------------------------------------------------------|---|---|
| 44  | (6S)Galβ1-4GlcNAcβ-Sp8                                                                               | 3 | 7 |
| 415 | GalNAcα1-3GalNAcβ1-3Galα1-4Galβ1-4Glcβ-Sp0                                                           | 3 | 4 |
| 434 | GlcNAcβ1-6(GlcNAcβ1-2)Manα1-6(GlcNAcβ1-4)(GlcNAcβ1-4(GlcNAcβ1-2)Manα1-3)Manβ1-4GlcNAcβ1-4GlcNAc-Sp21 | 3 | 6 |
| 366 | Neu5Acα2-6GlcNAcβ1-4GlcNAc-Sp21                                                                      | 3 | 4 |
| 339 | GlcNAcα1-4Galβ1-4GlcNAcβ-Sp0                                                                         | 3 | 6 |
| 112 | Galα1-3GalNAcβ-Sp8                                                                                   | 3 | 9 |
| 64  | Fucα1-2Galβ1-3GalNAcβ1-4(Neu5Acα2-3)Galβ1-4Glcβ-Sp9                                                  | 3 | 5 |
| 169 | Galβ1-4GlcNAcβ-Sp8                                                                                   | 2 | 5 |
| 190 | GlcNAcβ1-4GlcNAcβ1-4GlcNAcβ1-4GlcNAcβ1-4GlcNAcβ1-Sp8                                                 | 2 | 2 |
| 312 | MurNAcβ1-4GlcNAcβ-Sp10                                                                               | 2 | 2 |
| 101 | Galα1-3(Fucα1-2)Galβ1-3GlcNAcβ-Sp0                                                                   | 2 | 8 |
| 506 | GalNAcα1-3(Fucα1-2)Galβ1-3GlcNAcβ1-6GalNAcα-Sp14                                                     | 2 | 6 |
| 224 | Neu5Acα2-3Galβ1-3GalNAcα-Sp14                                                                        | 2 | 6 |
| 523 | GalNAcα1-3(Fucα1-2)Galβ1-4GlcNAcβ1-2Manα-Sp0                                                         | 2 | 5 |
| 355 | (6S)GlcNAcβ1-3Galβ1-4GlcNAcβ-Sp0                                                                     | 2 | 4 |
| 152 | Galβ1-4(Fucα1-3)GlcNAcβ-Sp8                                                                          | 2 | 7 |
| 493 | Galβ1-4(Fucα1-3)GlcNAcβ1-6(Neu5Acα2-6(Neu5Acα2-3Galβ1-3)GlcNAcβ1-3)Galβ1-4Glc-Sp21                   | 2 | 7 |
| 256 | Neu5Acα2-3Galβ1-4(Fucα1-3)GlcNAcβ1-3Galβ-Sp8                                                         | 2 | 5 |
| 600 | Neu5Acα2-3Galβ1-4GlcNAcβ1-3Galβ1-4GlcNAcβ1-6(Galβ1-3)GalNAcα-Sp14                                    | 2 | 5 |
| 393 | GalNAcα1-3(Fucα1-2)Galβ1-3GalNAcα1-3(Fucα1-2)Galβ1-4GlcNAcβ-Sp0                                      | 2 | 5 |
| 126 | Galβ1-3(Fucα1-4)GlcNAcβ1-3Galβ1-4(Fucα1-3)GlcNAcβ-Sp0                                                | 2 | 3 |
| 73  | Fucα1-2Galβ1-4GlcNAcβ1-3Galβ1-4GlcNAcβ-Sp0                                                           | 2 | 1 |
| 552 | Neu5Gcα2-8Neu5Gcα2-3Galβ1-4GlcNAc-Sp0                                                                | 2 | 5 |
| 171 | Galβ1-4Glcβ-Sp0                                                                                      | 2 | 2 |
| 569 | (3S)GlcAβ1-3Galβ1-4GlcNAcβ1-3Galβ1-4Glc-Sp0                                                          | 2 | 4 |
| 65  | Fucα1-2Galβ1-3GlcNAcβ1-3Galβ1-4Glcβ-Sp8                                                              | 1 | 1 |
| 186 | GlcNAcβ1-4-MDPLys                                                                                    | 1 | 3 |
| 598 | GlcNAcβ1-3Galβ1-4GlcNAcβ1-3Galβ1-4GlcNAcβ1-3GalNAcα-Sp14                                             | 1 | 2 |
| 130 | Fucα1-4(Galβ1-3)GlcNAcβ-Sp8                                                                          | 1 | 3 |
| 68  | Fucα1-2Galβ1-3GlcNAcβ-Sp8                                                                            | 1 | 7 |
| 175 | GlcNAcβ1-2Galβ1-3GalNAcα-Sp8                                                                         | 1 | 2 |
| 196 | Glcα1-4Glcα-Sp8                                                                                      | 1 | 2 |
| 269 | Neu5Acα2-6Galβ1-4GlcNAcβ-Sp8                                                                         | 1 | 3 |
| 272 | Neu5Acα2-6Galβ1-4Glcβ-Sp0                                                                            | 1 | 5 |

|     |                                                                                                                                                                                                                                            |    |   |
|-----|--------------------------------------------------------------------------------------------------------------------------------------------------------------------------------------------------------------------------------------------|----|---|
| 10  | Neu5Ac $\alpha$ -Sp11                                                                                                                                                                                                                      | 1  | 2 |
| 95  | GalNAc $\beta$ 1-3(Fuc $\alpha$ 1-2)Gal $\beta$ -Sp8                                                                                                                                                                                       | 1  | 3 |
| 500 | Fuc $\alpha$ 1-2Gal $\beta$ 1-3(6S)GlcNAc $\beta$ -Sp0                                                                                                                                                                                     | 1  | 7 |
| 558 | GlcNAc $\beta$ 1-3Gal $\beta$ 1-4GlcNAc $\beta$ 1-6(GlcNAc $\beta$ 1-3Gal $\beta$ 1-4GlcNAc $\beta$ 1-2)Man $\alpha$ 1-6(GlcNAc $\beta$ 1-3Gal $\beta$ 1-4GlcNAc $\beta$ 1-2)Man $\alpha$ 1-3)Man $\beta$ 1-4GlcNAc $\beta$ 1-4GlcNAc-Sp24 | 1  | 9 |
| 4   | GalNAc $\alpha$ -Sp8                                                                                                                                                                                                                       | 1  | 3 |
| 207 | Man $\alpha$ 1-2Man $\alpha$ 1-2Man $\alpha$ 1-3Man $\alpha$ -Sp9                                                                                                                                                                          | 0  | 3 |
| 270 | Neu5Ac $\alpha$ 2-6Gal $\beta$ 1-4GlcNAc $\beta$ 1-3Gal $\beta$ 1-4(Fuc $\alpha$ 1-3)GlcNAc $\beta$ 1-3Gal $\beta$ 1-4(Fuc $\alpha$ 1-3)GlcNAc $\beta$ -Sp0                                                                                | 0  | 6 |
| 507 | GlcNAc $\beta$ 1-6(GlcNAc $\beta$ 1-2)Man $\alpha$ 1-6(GlcNAc $\beta$ 1-4)(GlcNAc $\beta$ 1-4(GlcNAc $\beta$ 1-2)Man $\alpha$ 1-3)Man $\beta$ 1-4GlcNAc $\beta$ 1-4(Fuc $\alpha$ 1-6)GlcNAc-Sp21                                           | 0  | 5 |
| 245 | Neu5Ac $\alpha$ 2-3Gal $\beta$ -Sp8                                                                                                                                                                                                        | 0  | 3 |
| 441 | Neu5Ac $\alpha$ 2-3Gal $\beta$ 1-4GlcNAc $\beta$ 1-3Gal $\beta$ -Sp8                                                                                                                                                                       | 0  | 2 |
| 557 | Neu5Ac $\alpha$ 2-8Neu5Ac $\alpha$ 2-3Gal $\beta$ 1-4GlcNAc-Sp0                                                                                                                                                                            | 0  | 4 |
| 86  | GalNAc $\alpha$ 1-3(Fuc $\alpha$ 1-2)Gal $\beta$ 1-4GlcNAc $\beta$ -Sp8                                                                                                                                                                    | 0  | 3 |
| 84  | (3S)Gal $\beta$ 1-4(Fuc $\alpha$ 1-3)Glc $\beta$ -Sp0                                                                                                                                                                                      | 0  | 2 |
| 296 | 4S(3S)Gal $\beta$ 1-4GlcNAc $\beta$ -Sp0                                                                                                                                                                                                   | -1 | 7 |
| 325 | Neu5Ac $\alpha$ 2-3Gal $\beta$ 1-4GlcNAc $\beta$ 1-2Man $\alpha$ 1-6(Neu5Ac $\alpha$ 2-3Gal $\beta$ 1-4GlcNAc $\beta$ 1-2Man $\alpha$ 1-3)Man $\beta$ 1-4GlcNAc $\beta$ 1-4GlcNAc $\beta$ -Sp12                                            | -1 | 3 |
| 604 | GlcNAc $\beta$ 1-6(Neu5Ac $\alpha$ 2-3Gal $\beta$ 1-3)GalNAc $\alpha$ -Sp14                                                                                                                                                                | -1 | 7 |
| 335 | GalNAc $\alpha$ 1-3(Fuc $\alpha$ 1-2)Gal $\beta$ 1-4GlcNAc $\beta$ 1-3Gal $\beta$ 1-4GlcNAc $\beta$ -Sp0                                                                                                                                   | -1 | 6 |
| 266 | Neu5Ac $\alpha$ 2-6GalNAc $\beta$ 1-4GlcNAc $\beta$ -Sp0                                                                                                                                                                                   | -1 | 3 |
| 173 | GlcNAc $\alpha$ 1-3Gal $\beta$ 1-4GlcNAc $\beta$ -Sp8                                                                                                                                                                                      | -2 | 2 |
| 166 | Gal $\beta$ 1-4GlcNAc $\beta$ 1-6(Gal $\beta$ 1-3)GalNAc $\alpha$ -Sp8                                                                                                                                                                     | -2 | 5 |
| 294 | Neu5Ac $\alpha$ 2-3Gal $\beta$ 1-3GlcNAc $\beta$ 1-3Gal $\beta$ 1-3GlcNAc $\beta$ -Sp0                                                                                                                                                     | -2 | 6 |
| 129 | Gal $\beta$ 1-3(Fuc $\alpha$ 1-4)GlcNAc-Sp8                                                                                                                                                                                                | -4 | 4 |
| 90  | GalNAc $\alpha$ 1-3(Fuc $\alpha$ 1-2)Gal $\beta$ -Sp18                                                                                                                                                                                     | -4 | 2 |
| 164 | Gal $\beta$ 1-4GlcNAc $\beta$ 1-3Gal $\beta$ 1-4Glc $\beta$ -Sp0                                                                                                                                                                           | -5 | 5 |
| 108 | Gal $\alpha$ 1-3(Fuc $\alpha$ 1-2)Gal $\beta$ -Sp18                                                                                                                                                                                        | -6 | 2 |
